# Supplementary material
Source: PubMed Central journal article supplement (PMC3087292)
Supplement: NIHMS291907-supplement-Supplementary_Data.pdf [file NIHMS291907-supplement-Supplementary_Data.pdf]

**A**

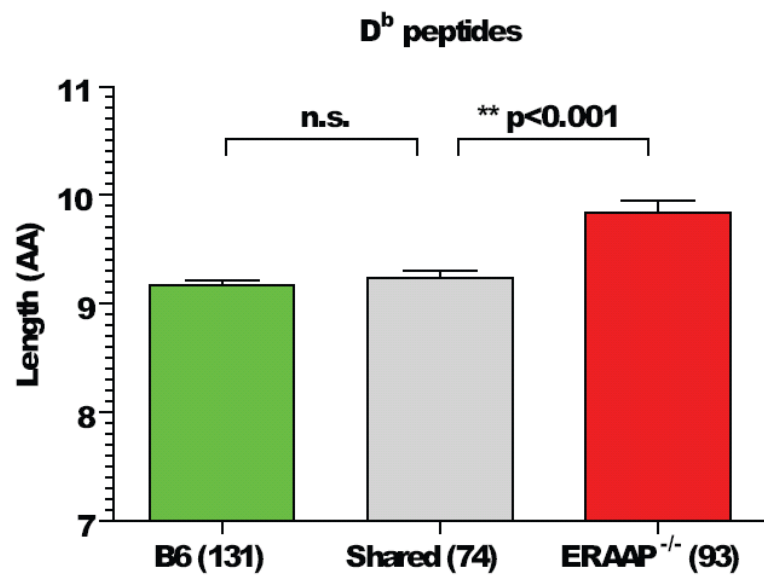

**B**

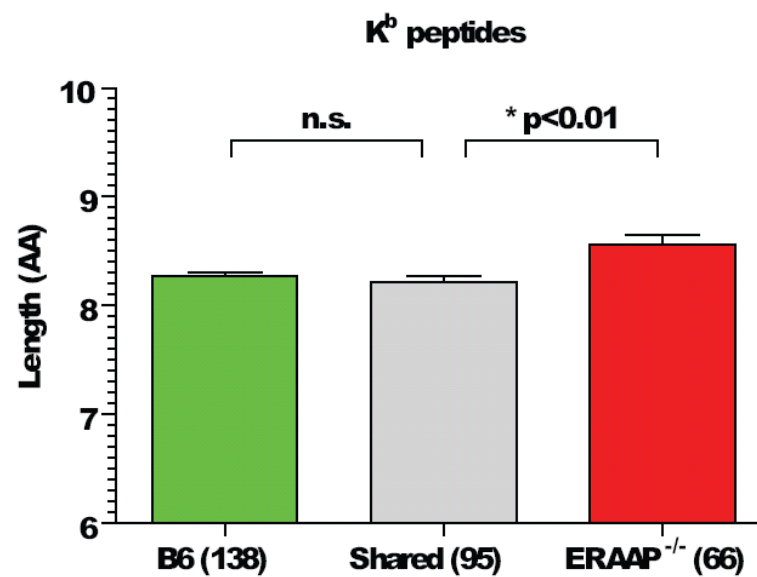

Blanchard *et al*, Sup. Fig. S2

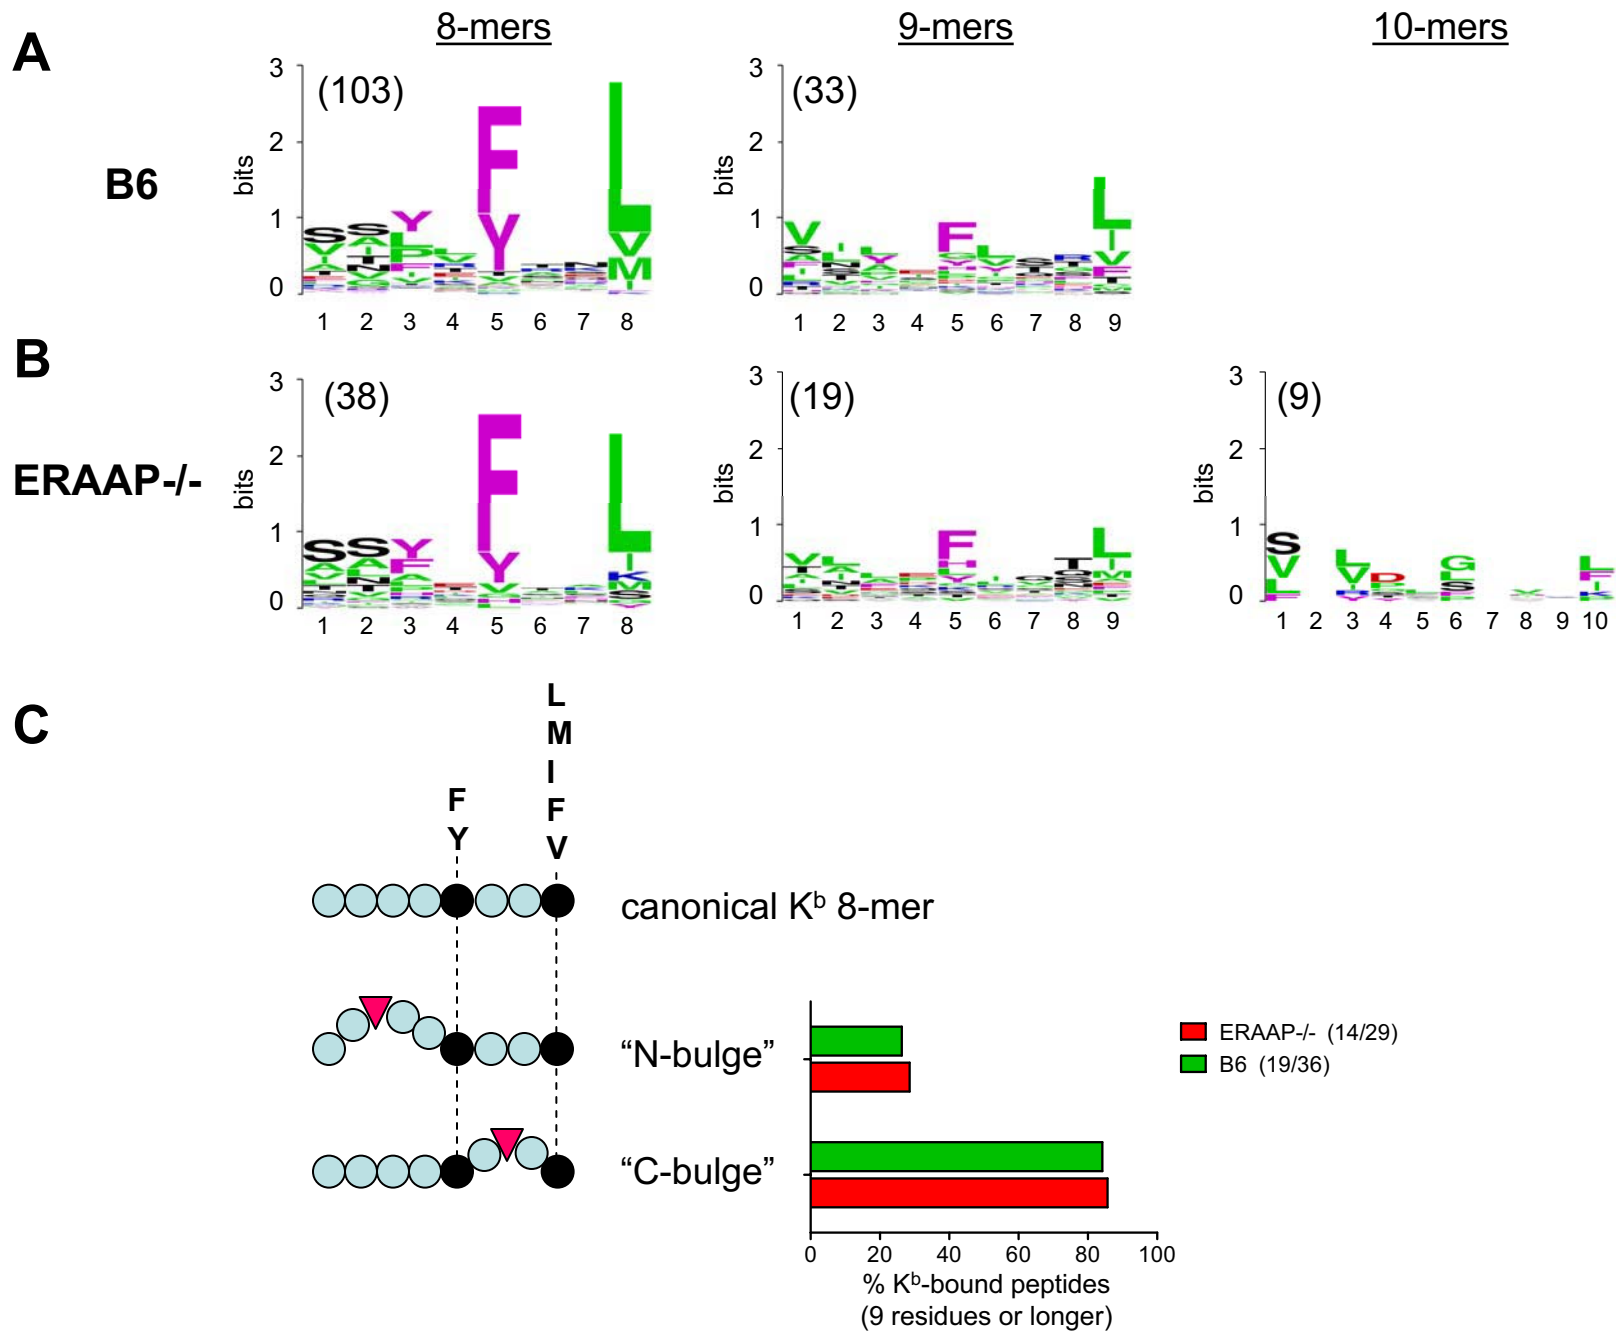

Blanchard *et al*, Sup. Fig. S3

**A**

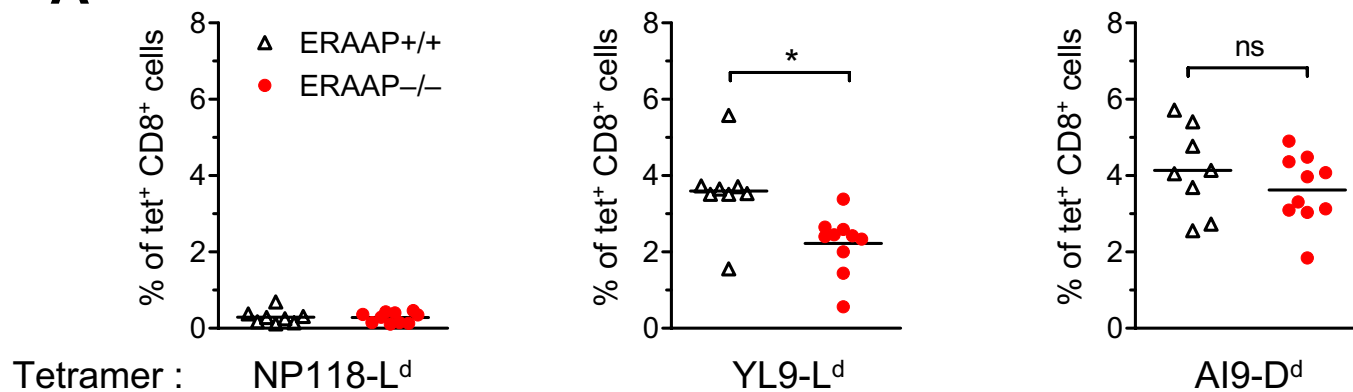

**B**

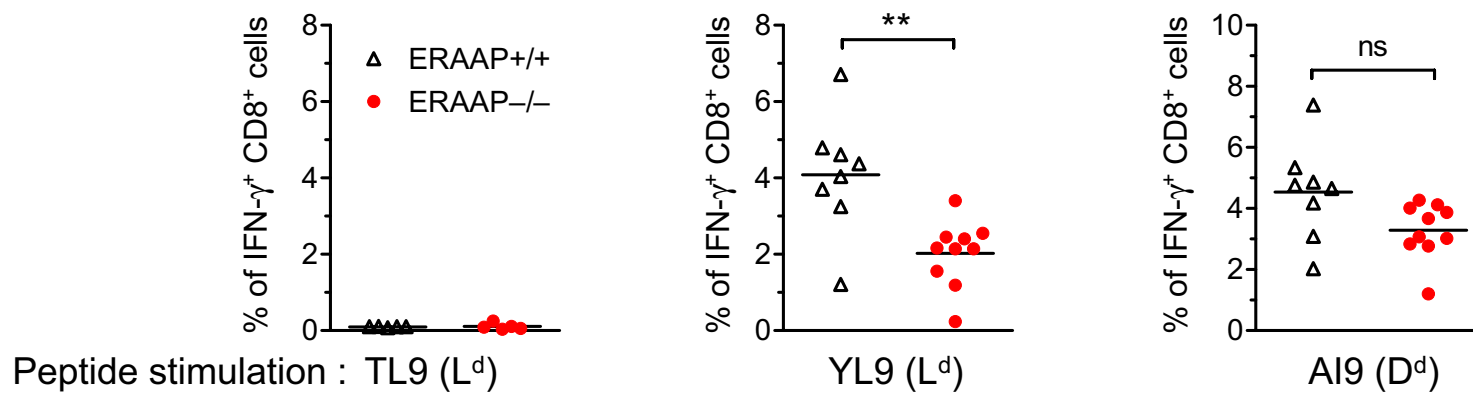

Blanchard *et al*, Sup. Fig. S4

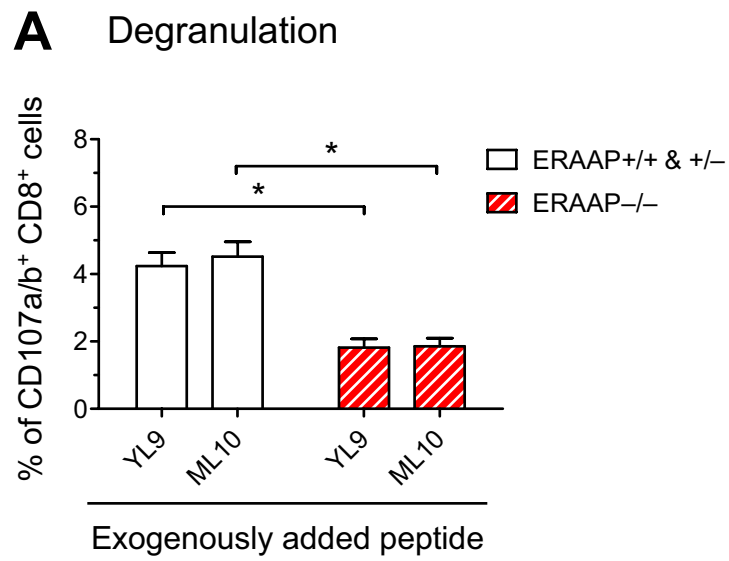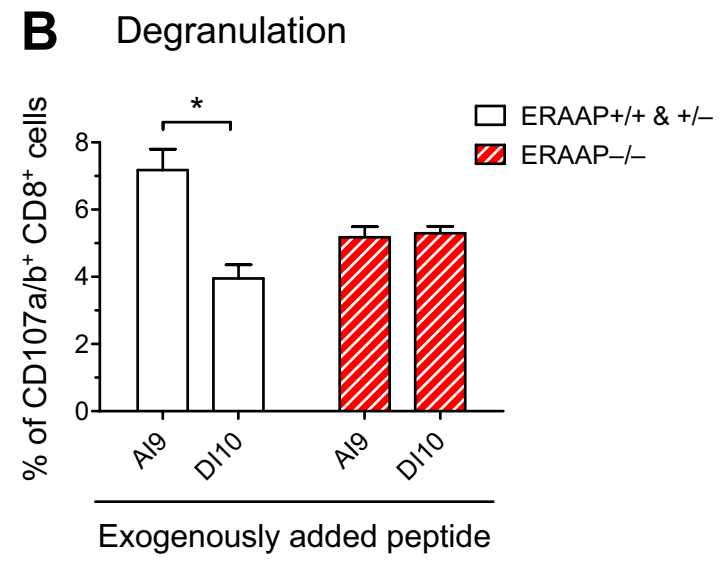

Blanchard *et al*, Sup. Fig. S5

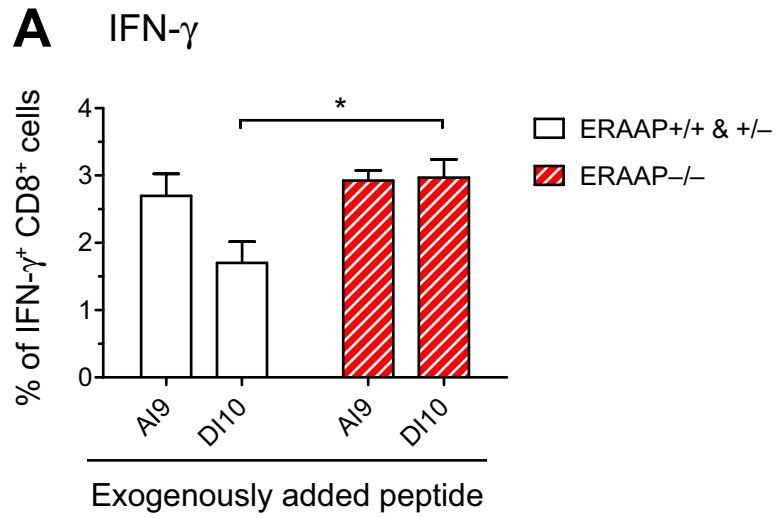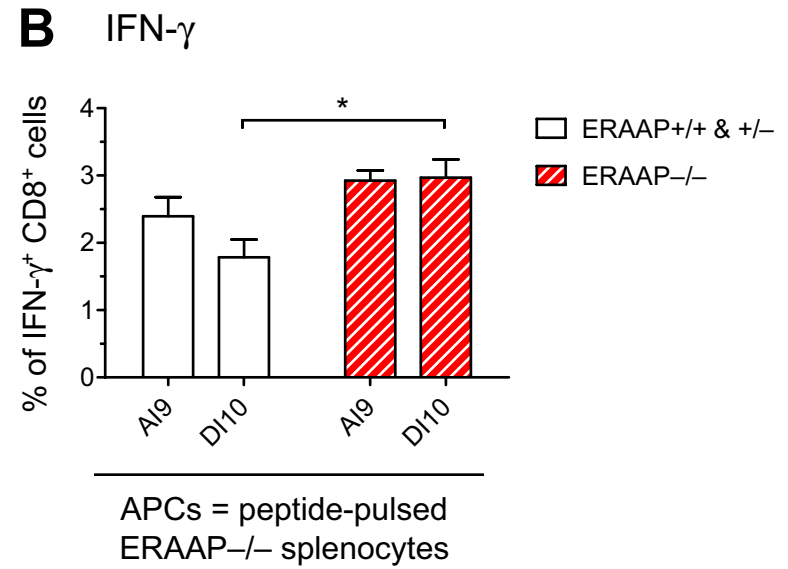

Blanchard *et al*, Sup. Fig. S6

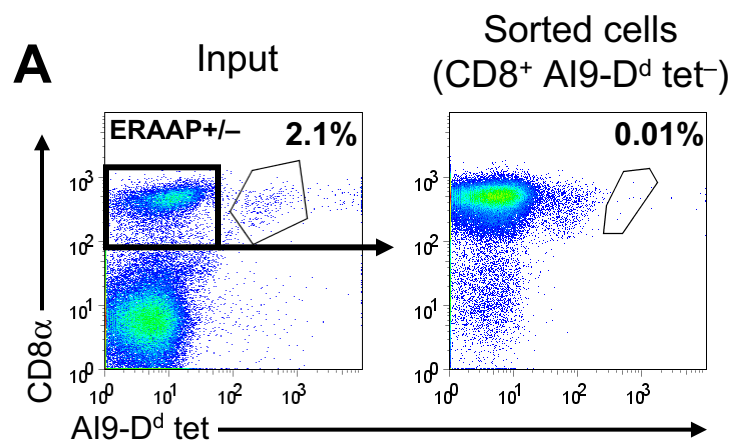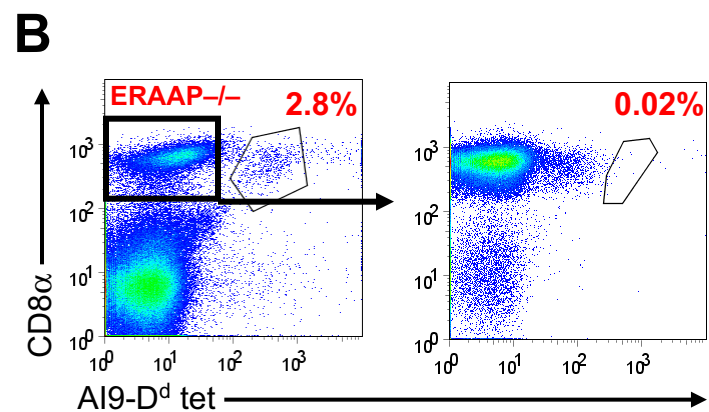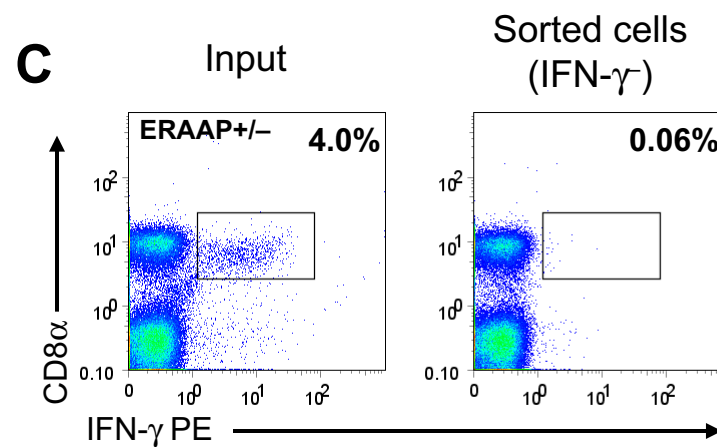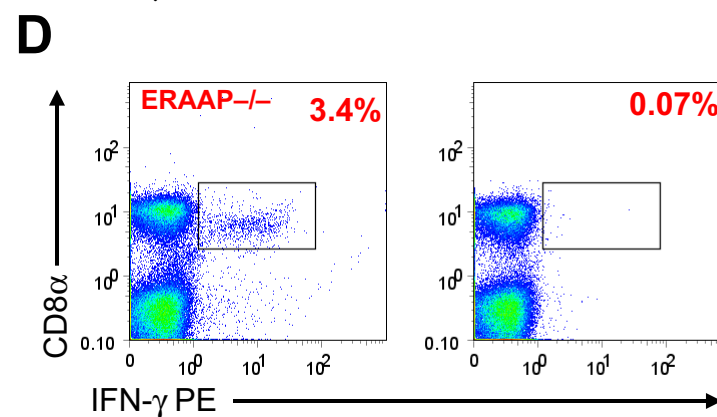

Blanchard *et al*, Sup. Fig. S7

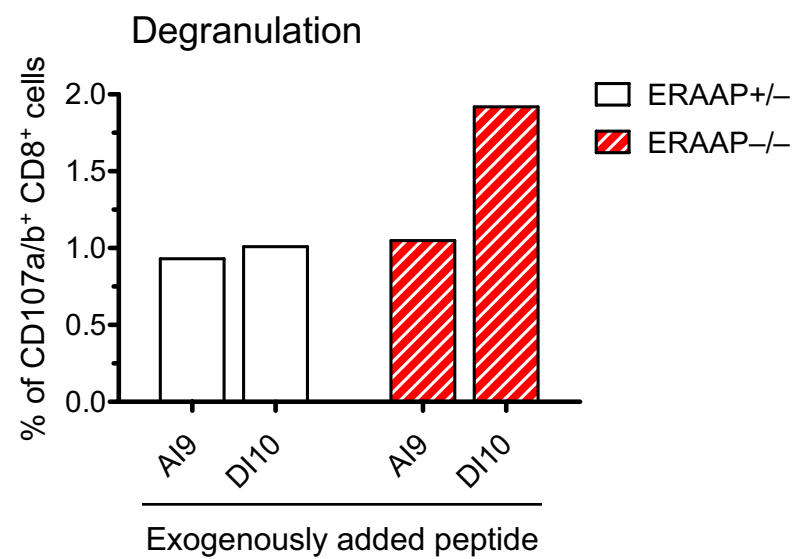

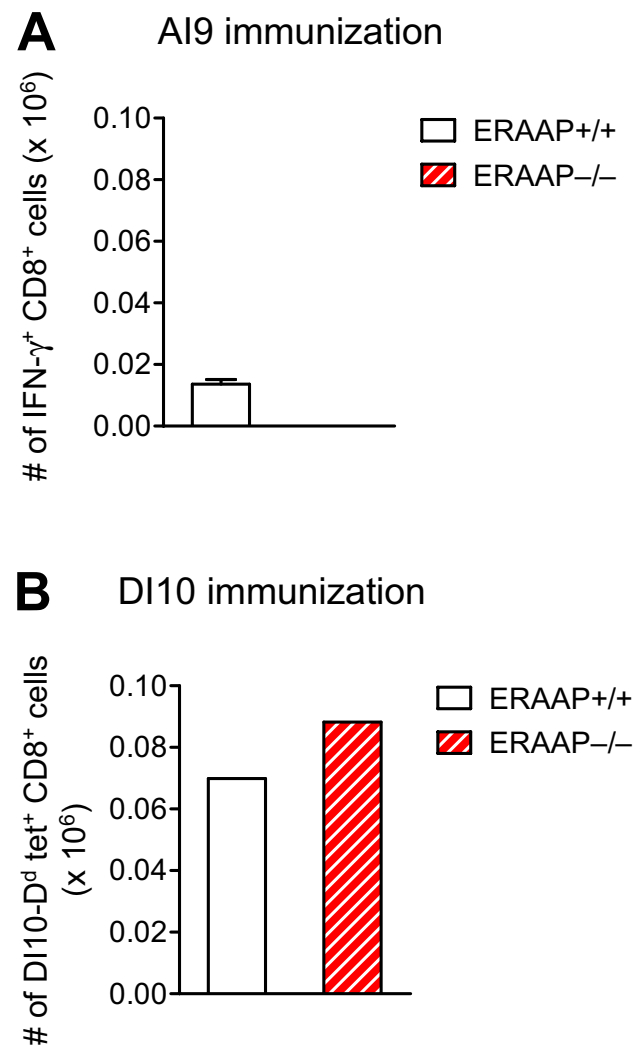



## **Supplemental Figure Legends**

### **Sup. Fig. S1 : Average length of the H-2<sup>b</sup> B6- and ERAAP<sup>-/-</sup> -specific pMHC I repertoire**

The length (mean +/- s.e.m.) of (A) H-2D<sup>b</sup>-bound and (B) H-2K<sup>b</sup>-bound peptides was plotted for unique H-2<sup>b</sup> B6- or ERAAP<sup>-/-</sup> -specific peptides, as well as for peptides shared between wild-type and ERAAP<sup>-/-</sup> mice. Number of peptides in each group is indicated between parentheses. p-values were calculated by unpaired two-tailed t-test based on the amino acid length.

### **Sup. Fig. S2. Amino acid composition of unique H-2K<sup>b</sup>-bound peptides recovered from B6.ERAAP<sup>-/-</sup> and wild-type B6 cells**

(A,B) Logo representation of unique H-2K<sup>b</sup>-bound (A) B6 or (B) ERAAP<sup>-/-</sup> peptide sequences analyzed independently according to their lengths shown on the X-axis. The height of each column is proportional to the degree of amino acid conservation and the height of each letter composing the column is proportional to its frequency at the given position. Numbers between parentheses indicate the number of peptide sequences analyzed. Groups containing less than 8 peptides (arbitrary choice) were not analyzed. Amino acids are colored as follows: acidic (red), basic (blue), hydrophobic (black), neutral (purple) and the others (green). (C) Unusually long and unique peptides were tentatively sorted into 2 categories according to the location of the bulge : between the N-terminus and the internal F/Y ("N-bulge") or between the internal F/Y and the C-terminus ("C-bulge"). See Sup Table S2 for peptide annotation. Bars show the fraction of

peptides in each category. As some peptides could be classified in two distinct categories, the sum of percentages may be higher than 100. Numbers between parentheses represent the number of peptides showing an apparent consensus motif (therefore included in the analysis) over the total number of longer and unique H-2K<sup>b</sup>-bound peptides.

**Sup Fig. S3 : The YL9-H-2L<sup>d</sup>-specific, but not the AI9-H-2D<sup>d</sup>-specific response, is reduced in ERAAP<sup>-/-</sup> mice after infection with a low dose of virus**

(A) Frequencies of NP118- (an irrelevant peptide from LCMV), YL9- and AI9-specific CD8<sup>+</sup> cells assessed by tetramer labeling 7 days post-infection with 10<sup>5</sup> pfu of mCMV. (B) IFN- $\gamma$  production by splenocytes restimulated exogenously with TL9 (an irrelevant  $\beta$ -galactosidase peptide), YL9 or AI9 seven days post-infection with 10<sup>5</sup> pfu of mCMV. Each dot represents an individual mouse. Data are pooled from two separate experiments. \* : p < 0.05 ; \*\* : p < 0.005

**Sup Fig. S4 : Degranulation of CD8<sup>+</sup> T cells in response to N-terminally extended YL9 and AI9 peptides**

Degranulation of CD8<sup>+</sup> T cells from the spleen 7 days post-infection in response to exogenously added (A) YL9 and ML10 or (B) AI9 and DI10 (see additional methods). Bars show the mean +/- s.e.m. with N = 3 to 5 mice for each group. \* : p < 0.05

**Sup Fig. S5 : Sustained DI10-H-2D<sup>d</sup>-specific response by ERAAP<sup>-/-</sup> CD8<sup>+</sup> T cells is not due to preferred loading on ERAAP<sup>-/-</sup> APCs**

IFN- $\gamma$  production by CD8<sup>+</sup> cells from the spleen 7 days post-infection in response to (A) exogenous AI9 or DI10 or (B) to naïve H-2<sup>d</sup> ERAAP<sup>-/-</sup> splenocytes previously pulsed with AI9 or DI10. Bars show the mean +/- s.e.m. with N = 3 to 5 mice for each group. \* : p < 0.05

**Sup Fig. S6 : Depletion efficiency after Facs-based or magnetic bead-based sorting**

(A, B) Splenocytes from infected H-2<sup>d</sup> (A) ERAAP<sup>+/-</sup> mice or (B) ERAAP<sup>-/-</sup> mice were stained with CD8 and the AI9-H-2D<sup>d</sup> tetramer (input). Right dot plots show the FACS-sorted CD8<sup>+</sup> AI9-H-2D<sup>d</sup> tetramer<sup>-</sup> population further labeled with DI10-H-2D<sup>d</sup> tetramer (see Fig. 6). Numbers represent percentages of tetramer<sup>+</sup> out of CD8<sup>+</sup> cells. Results are typical of 2 experiments performed with 3 mice pooled per genotype. (C, D) Splenocytes from infected H-2<sup>d</sup> (C) ERAAP<sup>+/-</sup> mice or (D) ERAAP<sup>-/-</sup> mice were stimulated with AI9 and IFN- $\gamma$ -producing cells were labeled, without fixation, using the Miltenyi IFN- $\gamma$  secretion assay (input) (see methods). Right dot plots show cells from the negative fraction after magnetic bead-based sorting, which were used in a subsequent regular IFN- $\gamma$  assay (see Fig. 6). Numbers represent percentages of IFN- $\gamma$ <sup>+</sup> out of CD8<sup>+</sup> cells. Results are typical of 2 experiments performed with 3 mice pooled per genotype.

**Sup Fig. S7 : Degranulation by DI10-H-2D<sup>d</sup>-specific CD8<sup>+</sup> T cells**

Degranulation of CD8<sup>+</sup> cells in response to AI9 or DI10 after depletion of AI9-H-2D<sup>d</sup>-responding cells. As in Fig. 6, splenocytes from infected mice were stimulated with synthetic AI9 and IFN- $\gamma$ -producing cells were labeled, without

fixation, using the Miltenyi IFN- $\gamma$  secretion assay (see methods). Bars show degranulation by CD8<sup>+</sup> IFN- $\gamma$ <sup>-</sup> cells pooled from 3 spleens per genotype.

**Sup Fig. S8 : Similar numbers of DI10-specific CD8<sup>+</sup> T cells induced by immunization with BMDCs**

Absolute numbers of DI10-H-2D<sup>d</sup>-specific CD8<sup>+</sup> cells in lymph nodes 7 days after immunization with (A) AI9-pulsed BMDCs. Numbers of IFN- $\gamma$ -producing CD8<sup>+</sup> cells in response to AI9 alone or to a mix of AI9 and DI10 were measured. Bars show the difference between both responses. Mean  $\pm$  s.e.m. (N = 3 mice).

Data representative of 2 independent experiments with 3 to 5 mice per group.

(B) Tetramer staining of lymph node cells from DI10-immunized mice depleted from AI9-H-2D<sup>d</sup> tetramer<sup>+</sup> CD8<sup>+</sup> cells by FACS sorting, as in Fig. 6B,C. Bars show absolute numbers of CD8<sup>+</sup> DI10-H-2D<sup>d</sup> tetramer<sup>+</sup> cells in the draining lymph nodes of three mice pooled per group.

205 D<sup>b</sup> peptides (C57BL/6 spleen cells)

| Accession # | Peptides |   |   |   |   |   |   |   |   |    |    |    |    | Bulge | m/z      | Protein entry name                                                         |
|-------------|----------|---|---|---|---|---|---|---|---|----|----|----|----|-------|----------|----------------------------------------------------------------------------|
|             | 1        | 2 | 3 | 4 | 5 | 6 | 7 | 8 | 9 | 10 | 11 | 12 | 13 |       |          |                                                                            |
| Q9JL26      | F        | Q | V | K | N | P | P | A | A | Y  | I  |    |    | N-    | 1247.679 | Formin-like protein 1                                                      |
| Q68FD5      | S        | A | I | M | N | P | A | S | K | V  | I  |    |    | C-    | 1130.624 | Clastrin heavy chain                                                       |
| Q9VW44      | F        | A | L | A | H | L | I | K | V | V  |    |    |    |       | 1125.678 | EH domain-containing protein 1                                             |
| Q3UW44      | S        | S | I | Q | N | G | K | Y | T | L  |    |    |    |       | 1110.58  | JmjC domain containing histone demethylation protein 1D                    |
| Q5DU02      | F        | A | V | V | H | Q | G | T | L | L  |    |    |    |       | 1085.574 | Ubiquitin carboxyl terminal hydrolase 22                                   |
| Q8BMK0      | L        | S | I | L | N | S | N | E | H | L  |    |    |    |       | 1139.606 | Coiled-coil domain-containing protein 21                                   |
| Q8BPI1      | V        | S | L | N | N | A | V | I | V | L  |    |    |    |       | 1041.642 | Uncharacterized protein C14orf104 homolog                                  |
| Q8V175      | Y        | A | L | E | N | F | V | E | N | L  |    |    |    |       | 1211.595 | Importin-4                                                                 |
| Q9DBS8      | G        | A | L | E | N | A | K | A | E | I  |    |    |    |       | 1015.542 | Uncharacterized protein C5orf37 homolog                                    |
| Q9Z1F9      | S        | M | A | G | N | I | I | P | A | I  |    |    |    |       | 986.534  | SUMO-activating enzyme subunit 2                                           |
| P08003      | S        | K | F | D | V | S | G | Y | P | T  | I  |    |    |       | 1213.611 | Protein disulfide-isomerase A4 precursor                                   |
| Q3U1N2      | A        | A | V | Q | N | P | A | L | T | A  | L  |    |    |       | 1068.605 | Sterol regulatory element-binding protein 2                                |
| Q3UHA3      | I        | H | G | S | A | S | T | V | D | S  | L  |    |    |       | 1086.543 | Spatacsin                                                                  |
| Q8BKT7      | Y        | Q | F | D | K | V | G | I | L | T  | L  |    |    |       | 1296.72  | THO complex subunit 5 homolog                                              |
| Q3THE2      | S        | L | G | K | N | P | T | D | A | Y  | L  |    |    |       | 1178.606 | Myosin regulatory light chain 2-B, smooth muscle isoform                   |
| Q8BYW1      | E        | D | S | K | P | Q | G | C | M | Y  | L  |    |    |       | 1270.545 | Rho GTPase-activating protein 25                                           |
| Q91WG4      | S        | A | P | R | N | F | V | E | N | F  |    |    |    |       | 1180.575 | Elongator complex protein 2                                                |
| O54826      | V        | G | S | S | P | V | G | S | E | I  |    |    |    |       | 931.474  | Protein AF-10                                                              |
| O55112      | T        | T | I | S | S | I | T | P | T | I  |    |    |    |       | 1033.578 | AF4/FMR2 family member 2                                                   |
| P16277      | R        | S | L | D | N | G | G | Y | Y | I  |    |    |    |       | 1157.559 | Tyrosine-protein kinase BLK                                                |
| P61161      | Y        | A | G | S | N | F | P | E | H | I  |    |    |    |       | 1134.522 | Actin-related protein 2                                                    |
| Q02257      | Y        | T | D | G | V | R | M | E | E | I  |    |    |    |       | 1212.557 | Junction plakoglobin                                                       |
| Q8BG30      | I        | A | S | L | L | T | A | A | V | I  |    |    |    |       | 971.614  | Negative elongation factor A                                               |
| Q8VHI3      | L        | Y | K | D | G | V | A | I | I |    |    |    |    |       | 1048.616 | GDP-fucose protein O-fucosyltransferase 2 precursor                        |
| Q9CS72      | A        | M | S | P | V | T | I | T | T | I  |    |    |    |       | 1033.56  | Filamin-A-interacting protein 1                                            |
| P51943      | V        | S | L | L | N | P | P | E | T | L  |    |    |    |       | 1082.61  | Cyclin-A2                                                                  |
| P58064      | S        | A | V | E | N | I | L | E | H | L  |    |    |    |       | 1124.595 | Mitochondrial 28S ribosomal protein S6                                     |
| Q8COL9      | F        | G | I | H | N | G | V | E | T | L  |    |    |    |       | 1086.558 | Putative glycerophosphodiester phosphodiesterase 5                         |
| Q99PL5      | S        | S | I | V | N | S | I | Q | V | L  |    |    |    |       | 1059.605 | Ribosome-binding protein 1                                                 |
| Q9CQG2      | T        | A | I | E | N | S | W | I | H | L  |    |    |    |       | 1183.611 | Putative methyltransferase METT10D                                         |
| Q9D3G9      | Y        | S | V | A | N | H | N | S | F | L  |    |    |    |       | 1151.549 | Rho-related GTP-binding protein RhoH precursor                             |
| Q9DB00      | N        | A | P | Q | N | P | E | S | K | L  |    |    |    |       | 1097.559 | GON-4-like protein                                                         |
| Q9LFN8      | S        | F | A | L | S | G | P | K | L | L  |    |    |    |       | 1032.609 | Glutamate receptor 2.6 precursor                                           |
| P19973      | R        | Q | P | S | I | E | L | P | S | M  |    |    |    |       | 1157.599 | Lymphocyte-specific protein 1                                              |
| P97412      | I        | N | V | I | A | G | G | L | E | N  |    |    |    |       | 999.548  | Lysosomal-trafficking regulator                                            |
| A2AIV2      | R        | Q | I | L | N | A | D | A | M |    |    |    |    |       | 1031.531 | Protein virilizer homolog                                                  |
| O35127      | S        | A | P | E | N | A | V | R | M |    |    |    |    |       | 974.473  | Protein C10                                                                |
| O35134      | T        | G | K | Q | V | V | S | T | L |    |    |    |    |       | 932.542  | DNA directed RNA polymerase I subunit RPA1                                 |
| O35598      | S        | G | I | R | N | I | S | F | M |    |    |    |    |       | 1024.525 | ADAM 10 precursor                                                          |
| O35604      | V        | A | V | V | N | K | V | D | I |    |    |    |    |       | 956.578  | Niemann-Pick C1 protein precursor                                          |
| O35643      | V        | A | L | R | N | I | N | L | I |    |    |    |    |       | 1025.647 | AP-1 complex subunit beta-1                                                |
| O35737      | F        | S | P | L | N | P | V | R | V |    |    |    |    |       | 1028.589 | Heterogeneous nuclear ribonucleoprotein H                                  |
| O35988      | K        | A | P | T | N | E | F | Y | A |    |    |    |    |       | 1040.505 | Syndecan-4 precursor                                                       |
| O70551      | I        | S | G | V | N | G | T | H | I |    |    |    |    |       | 897.479  | Serine/threonine-protein kinase SRPK1                                      |
| O88491      | E        | L | S | R | I | A | N | S | L |    |    |    |    |       | 1002.558 | Histone-lysine N-methyltransferase, H3 lysine-36 and H4 lysine-20 specific |
| O88904      | S        | L | L | T | N | H | V | T | L |    |    |    |    |       | 997.568  | Homeodomain interacting protein kinase 1                                   |
| P01899      | F        | A | Y | E | G | R | D | Y | I |    |    |    |    |       | 1133.527 | H-2 class I histocompatibility antigen, D-B alpha chain precursor          |
| P04441      | S        | Q | M | R | M | A | T | P | L |    |    |    |    |       | 1034.513 | H-2 class II histocompatibility antigen gamma chain                        |
| P07742      | F        | Q | I | V | N | P | H | L | L |    |    |    |    |       | 1080.621 | Ribonucleoside-diphosphate reductase large subunit                         |
| P09581      | F        | A | P | K | N | I | Y | S | I |    |    |    |    |       | 1052.578 | Macrophage colony-stimulating factor 1 receptor precursor                  |
| P14576      | A        | T | I | I | N | E | E | V | L |    |    |    |    |       | 1001.552 | Signal recognition particle 54 kDa protein                                 |
| P14901      | I        | Q | A | E | N | A | E | F | M |    |    |    |    |       | 1052.472 | Heme oxygenase 1                                                           |
| P16546      | K        | A | L | I | N | A | D | E | L |    |    |    |    |       | 986.552  | Spectrin alpha chain, brain                                                |
| P17918      | A        | M | G | V | N | L | T | S | M |    |    |    |    |       | 923.433  | Proliferating cell nuclear antigen                                         |
| P19096      | T        | A | L | E | N | L | S | T | L |    |    |    |    |       | 961.521  | Fatty acid synthase                                                        |
| P20693      | T        | A | I | Q | N | V | S | H | V |    |    |    |    |       | 968.516  | Low affinity immunoglobulin epsilon Fc receptor                            |
| P23492      | S        | L | I | T | N | K | V | V | M |    |    |    |    |       | 1004.581 | Purine nucleoside phosphorylase                                            |
| P24547      | G        | G | I | Q | N | V | G | H | I |    |    |    |    |       | 894.48   | Inosine 5' monophosphate dehydrogenase 2                                   |
| P24638      | R        | S | I | Q | N | A | Q | F | L |    |    |    |    |       | 1076.585 | Lysosomal acid phosphatase precursor                                       |
| P26039      | V        | M | V | T | N | V | T | S | L |    |    |    |    |       | 963.519  | Talin-1                                                                    |
| P27005      | V        | Q | N | I | N | I | E | N | L |    |    |    |    |       | 1056.569 | Protein S100-A8                                                            |
| P27773      | F        | A | H | T | N | I | E | S | L |    |    |    |    |       | 1031.516 | Protein disulfide-isomerase A3 precursor                                   |
| P28063      | G        | G | V | V | N | M | Y | H | M |    |    |    |    |       | 1007.444 | Proteasome subunit beta type-8 precursor                                   |
| P28658      | N        | S | I | R | N | L | D | T | I |    |    |    |    |       | 1045.564 | Ataxin-10                                                                  |
| P36423      | L        | G | P | K | N | G | V | Y | I |    |    |    |    |       | 960.552  | Thromboxane-A synthase                                                     |
| P42209      | S        | T | L | I | N | S | L | F | L |    |    |    |    |       | 1007.578 | Septin-1                                                                   |
| P42228      | S        | I | L | V | N | Q | E | V | L |    |    |    |    |       | 1014.584 | Signal transducer and activator of transcription 4                         |
| P46414      | F        | G | P | V | N | H | E | E | L |    |    |    |    |       | 1041.501 | Cyclin-dependent kinase inhibitor 1B                                       |
| P54823      | I        | N | F | D | F | P | K | L |   |    |    |    |    |       | 993.541  | Probable ATP-dependent RNA helicase DDX6                                   |
| P55264      | S        | A | V | V | D | K | D | F | L |    |    |    |    |       | 993.526  | Adenosine kinase                                                           |
| P58021      | T        | N | V | L | T | S | F | L |   |    |    |    |    |       | 1007.578 | Transmembrane 9 superfamily member 2 precursor                             |
| P58252      | R        | I | V | E | N | V | N | V | I |    |    |    |    |       | 1055.637 | Elongation factor 2                                                        |
| P58462      | S        | M | A | E | N | S | I | P | L |    |    |    |    |       | 961.467  | Forkhead box protein P1                                                    |
| P59016      | A        | S | L | V | N | A | D | K | L |    |    |    |    |       | 930.526  | Vacuolar protein sorting-associated protein 33B                            |
| P59326      | G        | S | V | V | N | S | V | A | L |    |    |    |    |       | 845.473  | YTH domain family protein 1                                                |
| P61982      | A        | A | M | K | N | V | T | E | L |    |    |    |    |       | 976.514  | 14 3 3 protein gamma                                                       |
| P62830      | A        | A | G | V | G | D | M | V | M |    |    |    |    |       | 850.38   | 60S ribosomal protein L23                                                  |
| P63005      | A        | I | M | P | N | G | D | H | I |    |    |    |    |       | 967.467  | Platelet-activating factor acetylhydrolase IB subunit alpha                |
| P70168      | A        | A | L | Q | N | L | V | K | I |    |    |    |    |       | 969.61   | Importin subunit beta-1                                                    |
| P70372      | G        | A | V | T | N | V | K | V | I |    |    |    |    |       | 900.552  | ELAV-like protein 1                                                        |
| P70428      | A        | S | V | S | N | P | L | F | L |    |    |    |    |       | 947.52   | Exostosin-2                                                                |
| P70436      | E        | R | A | Q | L | A | A | Q | L |    |    |    |    |       | 999.559  | Homeobox protein DLX-4                                                     |
| P84089      | Y        | Q | P | Y | N | K | D | W | I |    |    |    |    |       | 1226.585 | Enhancer of rudimentary homolog                                            |
| P97313      | S        | A | L | I | N | L | V | E | F |    |    |    |    |       | 1005.562 | DNA-dependent protein kinase catalytic subunit                             |
| Q03350      | V        | S | S | D | N | Q | F | L | L |    |    |    |    |       | 1022.516 | Thrombospondin-2 precursor                                                 |
| Q0VF94      | F        | L | Q | P | V | I | T | E | L |    |    |    |    |       | 1059.609 | NTPase KAP family P-loop domain-containing protein 1                       |
| Q3TCJ1      | S        | Q | I | S | N | T | E | F | L |    |    |    |    |       | 1038.511 | Uncharacterized protein KIAA0157                                           |
| Q3TGF2      | L        | A | P | Q | N | K | P | E | L |    |    |    |    |       | 1009.568 | Protein FAM107B                                                            |
| Q3U133      | A        | A | P | I | S | P | W | T | M |    |    |    |    |       | 973.482  | Zinc finger protein 746                                                    |
| Q3UHC7      | V        | S | P | T | N | P | T | K | L |    |    |    |    |       | 956.542  | Disabled homolog 2-interacting protein                                     |
| Q3ULJ0      | G        | A | L | K | N | L | V | A | V |    |    |    |    |       | 884.557  | Glycerol-3-phosphate dehydrogenase 1-like protein                          |
| Q3UJ45      | R        | A | I | E | N | I | D | T | L |    |    |    |    |       | 1044.569 | Protein phosphatase 1 regulatory subunit 7                                 |
| Q4JIM5      | S        | S | L | I | N | G | S | F | L |    |    |    |    |       | 937.5    | Tyrosine-protein kinase ABL2                                               |
| Q571F8      | E        | A | V | R | N | T | L | S | L |    |    |    |    |       | 1002.558 | Glutaminase liver isoform, mitochondrial precursor                         |
| Q5EG47      | W        | K | V | N | P | V | Y | L |   |    |    |    |    |       | 1181.636 | 5'-AMP-activated protein kinase catalytic subunit alpha-1                  |
| Q5SZV5      | G        | Y | V | N | V | T | V | M | P |    |    |    |    |       | 979.492  | Uncharacterized protein KIAA03                                             |

|        |                         |          |                                                                               |
|--------|-------------------------|----------|-------------------------------------------------------------------------------|
| Q62419 | V R T I E Y L Q         | 1021.568 | Endophilin A2                                                                 |
| Q62471 | L A F I N N G N L F S   | 983.459  | Vomeronal secretory protein 1 precursor                                       |
| Q64280 | L E Q I L L G S N L L H | 1000.568 | Left right determination factor 1 precursor                                   |
| Q64511 | N S M V L V F D L H Q M | 1093.481 | DNA topoisomerase 2 beta                                                      |
| Q66K08 | S A T V I N A E F F V L | 951.479  | Cartilage intermediate layer protein 1 precursor                              |
| Q69ZF8 | A T V S N G G P A I V L | 905.473  | Male specific lethal 2 like 1                                                 |
| Q6P073 | F M V E K G P T L V L   | 1021.539 | Ubiquitin conjugating enzyme E2 J2                                            |
| Q6VNB8 | L A S V G N P A I V L   | 841.478  | WD repeat and FYVE domain-containing protein 3                                |
| Q6WKZ8 | S L P T N L I H L       | 1007.589 | E3 ubiquitin-protein ligase UBR2                                              |
| Q6ZPV2 | I S G L L P Y I S L L   | 963.515  | Putative DNA helicase INO80 complex homolog 1                                 |
| Q7G9P4 | L P Y L N A A F L L     | 1021.572 | Abscisic-aldehyde oxidase                                                     |
| Q77MR0 | Q M P K L E A F L L     | 1038.595 | Lysosomal Pro-X carboxypeptidase precursor                                    |
| Q77NT2 | A A V L N P R F I L     | 1076.581 | Fatty acyl-CoA reductase 2                                                    |
| Q77PS5 | G S L T N V T L L       | 1000.594 | Uncharacterized protein KIAA0528                                              |
| Q80TH2 | I A P T N A E V L L     | 932.542  | Protein LAP2                                                                  |
| Q80U28 | A A L Q N A V A F L     | 927.515  | MAP kinase-activating death domain protein                                    |
| Q80V11 | V S V A N V D A L L     | 904.489  | Tripartite motif-containing protein 56                                        |
| Q80Y17 | W A V S N R E M L L     | 929.531  | Lethal (2) giant larvae protein homolog 1                                     |
| Q80YQ8 | S K L A N I D Y L L     | 1105.546 | Protein RMD5 homolog A                                                        |
| Q811L6 | A A P S N L P Y L L     | 1036.568 | Microtubule-associated serine/threonine-protein kinase 4                      |
| Q8BFV3 | S A I I N E D N L L     | 945.505  | Dual specificity protein phosphatase 4                                        |
| Q8BG67 | I G P K N Y E F L L     | 988.495  | Protein EFR3 homolog A                                                        |
| Q8BHY8 | T S L L N L T V I L     | 1080.573 | Sorting nexin-14                                                              |
| Q8BM54 | A A P F D T V H I L     | 973.593  | E3 ubiquitin-protein ligase MYLIP                                             |
| Q8BNV1 | S A L A N Y I H L L     | 970.5    | HpalI tiny fragments locus 9c protein                                         |
| Q8BPS4 | V S L L D I D H L L     | 1001.542 | Integral membrane protein GPR180 precursor                                    |
| Q8BQM4 | S S V L N L T E L L     | 1024.568 | HEAT repeat-containing protein 3                                              |
| Q8BW56 | A M L T N L E S L L     | 975.536  | Glycosyltransferase-like domain-containing protein 1                          |
| Q8BZQ7 | Y G L L N V T K I L     | 991.513  | Anaphase-promoting complex subunit 2                                          |
| Q8C0D4 | F S Y L N P Q E L L     | 1020.609 | Rho GTPase-activating protein 12                                              |
| Q8C2S5 | S M V Q N R V F L L     | 1110.547 | F-box/LRR-repeat protein 5                                                    |
| Q8C3J5 | K S V E N F V S L L     | 1093.583 | Dedicator of cytokinesis protein 2                                            |
| Q8C3J5 | S A P I N S V L L L     | 1022.552 | Dedicator of cytokinesis protein 2                                            |
| Q8C4N4 | F S V T N P H T M L     | 913.536  | PG-loop repeat-containing protein 2                                           |
| Q8CDD9 | F Q N V N S V T L L     | 1033.478 | Uncharacterized protein C1orf103 homolog                                      |
| Q8CDN6 | L A I R N D E E L L     | 1021.532 | Thioredoxin-like protein 1                                                    |
| Q8CGP5 | V N K V K E T E L L     | 1072.564 | Histone H2A type 1-F                                                          |
| Q8CHH9 | T S V E N H E F L L     | 1059.605 | Septin-8                                                                      |
| Q8CJF7 | K A T T N I V E M L     | 1075.506 | AT-hook-containing transcription factor 1                                     |
| Q8K1H7 | S E A A Q L A E E I L   | 1006.524 | T complex protein 11 like 2                                                   |
| Q8K268 | E E I S M L G E I L     | 931.474  | ATP-binding cassette sub-family F member 3                                    |
| Q8R1S4 | F A P Y N K P S L L     | 1020.492 | Metastasis suppressor protein 1                                               |
| Q8R3P2 | V A P Y N T T Q F L     | 1036.547 | Protein deltex 2                                                              |
| Q8R409 | I S L I D P K F K L     | 1040.505 | Protein HEXIM1                                                                |
| Q8RFX1 | F I P N I Y A A L L     | 1060.641 | Probable splicing factor 3 subunit 1                                          |
| Q8VHN7 | S A V K N L Q Q L L     | 1021.609 | G-protein coupled receptor 98 precursor                                       |
| Q8VJ8  | T A P Y N Y S Y I L     | 1000.568 | Protein C16orf35 homolog                                                      |
| Q91V41 | Q T V E N V E H L L     | 1091.505 | Ras-related protein Rab-14                                                    |
| Q91V83 | A A L K N L T Y F L     | 1068.533 | Uncharacterized protein KIAA0406 homolog                                      |
| Q91WM3 | G A V K N L T Y F L     | 929.531  | U3 small nucleolar RNA-interacting protein 2                                  |
| Q91Y74 | L S L Q E L Q T I L     | 1012.547 | CMP-N-acetylneuraminate-beta-galactosamide-alpha-2,3-sialyltransferase        |
| Q91Y10 | K V K H L V F L L       | 1044.594 | Argininosuccinate lyase                                                       |
| Q91YM4 | S Q L V K A D E R M Q   | 1047.636 | Protein TBRG4                                                                 |
| Q91YW3 | L G I Q D L E R Q L     | 1020.504 | DnaJ homolog subfamily C member 3                                             |
| Q91ZU1 | T A P V N I A V I L     | 1071.58  | Ankyrin repeat and SOCS box protein 6                                         |
| Q99JF5 | S S L V N S Q T L L     | 897.541  | Diphosphomevalonate decarboxylase                                             |
| Q99K90 | S G L Q N F A E L L     | 948.5    | Mitogen-activated protein kinase kinase 7-interacting protein 2               |
| Q99KD5 | M A P Q N L S T F L     | 978.49   | UNC45 homolog A                                                               |
| Q99KV1 | A S P E G Q D Y L L     | 1008.482 | DnaJ homolog subfamily B member 11 precursor                                  |
| Q99LF4 | V S L N L R Q V L L     | 979.437  | UPF0027 protein C22orf28 homolog                                              |
| Q99N32 | A S V L N V N H I L     | 1041.642 | Beta-klotho                                                                   |
| Q99NH0 | V S P L N V T A V L     | 966.537  | Ankyrin repeat domain-containing protein 17                                   |
| Q9CR27 | S A I F N F Q S L L     | 899.52   | Coiled-coil domain-containing protein 53                                      |
| Q9CR64 | I Q I A N V T T L L     | 1026.526 | Transmembrane protein 167 precursor                                           |
| Q9CU65 | L Q F L N P D P L L     | 972.573  | MYM-type zinc finger protein 2                                                |
| Q9CV12 | G I P N I P V H P L     | 1009.485 | Protein FAM133B                                                               |
| Q9CWU0 | G A L K N T Y F L       | 1056.559 | Tudor domain-containing protein 12                                            |
| Q9CZR2 | F A I Q N P T L I L     | 943.537  | N-acetylated-alpha-linked acidic dipeptidase 2                                |
| Q9D020 | E S L Q M S L S L L     | 1028.505 | Cytosolic 5'-nucleotidase 3                                                   |
| Q9D2H6 | V A L E N A N A V L     | 1016.578 | Transcription factor Sp2                                                      |
| Q9D662 | S A I T N V A K I L     | 1007.508 | Protein transport protein Sec23B                                              |
| Q9D6Z1 | S S P V N P V V F L     | 900.479  | Nucleolar protein 5A                                                          |
| Q9D757 | S G I I D S D F L L     | 916.547  | Death associated protein like 1                                               |
| Q9D868 | R I L E G G H V M L     | 945.505  | Peptidyl-prolyl cis-trans isomerase H                                         |
| Q9D8P7 | S G L L N Q Q S L L     | 966.478  | General transcription factor 3C polypeptide 6                                 |
| Q9DAM9 | V G V N N P V F L L     | 1011.541 | Fibronectin type 3 and ankyrin repeat domains 1 protein                       |
| Q9DB40 | G A V Q N I A H L L     | 959.527  | Mediator of RNA polymerase II transcription subunit 27                        |
| Q9DBN5 | I Q L M M T A H L L     | 958.536  | Peroxisomal Lon protease homolog 2                                            |
| Q9DBR3 | F S E E N H E P L L     | 922.511  | Armadillo repeat-containing protein 8                                         |
| Q9DC50 | L G L S N L T H L L     | 1040.556 | Peroxisomal carnitine O-octanoyltransferase                                   |
| Q9EQH3 | G A V F N G I T L L     | 1101.485 | Vacuolar protein sorting-associated protein 35                                |
| Q9EQU3 | F S L Q N Q L R L L     | 967.558  | Toll-like receptor 9 precursor                                                |
| Q9ES97 | V S S I N Q E A L L     | 891.494  | Reticulon-3                                                                   |
| Q9JJ28 | Y V H V N R D T L L     | 1118.632 | Protein flightless-1 homolog                                                  |
| Q9JKP8 | R A I P N N Q V L L     | 960.5    | Chromatin accessibility complex protein 1                                     |
| Q9JLV6 | G A P L N L V D L L     | 1116.58  | Bifunctional polynucleotide phosphatase/kinase                                |
| Q9JMG1 | F S V E N F D A L L     | 1024.59  | Endothelial differentiation-related factor 1                                  |
| Q9QWT9 | L S L L L P K Y N S     | 911.52   | Kinesin-like protein KIFC1                                                    |
| Q9QXH4 | A A I L Y Q K Q S L     | 1041.489 | Integrin alpha-X precursor                                                    |
| Q9QYC7 | F G P I N S V A F L     | 1060.641 | Vitamin K-dependent gamma-carboxylase                                         |
| Q9QYX7 | S A I S N L D Y I L     | 1021.568 | Protein piccolo                                                               |
| Q9QZD9 | L Q L L N T D Y L L     | 951.494  | Eukaryotic translation initiation factor 3 subunit I                          |
| Q9R0C8 | Y A P I N A N A I L     | 995.505  | Protein vav-3                                                                 |
| Q9R0L6 | Y V V D N I D H L L     | 1092.594 | Pericentriolar material 1 protein                                             |
| Q9R190 | A A L Q N L E Q L L     | 946.5    | Metastasis-associated protein MTA2                                            |
| Q9R1A8 | L S L P N T D Y I L     | 1087.542 | E3 ubiquitin-protein ligase RFW2                                              |
| Q9WTK5 | S L L S N L D E I L     | 999.548  | Nuclear factor NF-kappa-B p100 subunit                                        |
| Q9WTK2 | V T V L N V D H L L     | 1035.536 | Interferon-inducible double stranded RNA-dependent protein kinase activator A |
| Q9WU78 | A I V E H L V T L L     | 1003.531 | Programmed cell death 6-interacting protein                                   |
| Q9WUF3 | V A P R S S A E L L     | 1009.568 | CASP8-associated protein 2                                                    |
| Q9Z1E3 | S L I I L K Q V M L     | 994.594  | NF-kappa-B inhibitor alpha                                                    |
| Q9Z1S0 | F S P F N P T S L L     | 929.506  | Mitotic checkpoint serine/threonine-protein kinase BUB1 beta                  |
| Q9Z2U1 |                         | 1044.649 | Proteasome subunit alpha type-5                                               |
| Q9Z2U4 |                         | 1009.5   | ETS-related transcription factor Elf-4                                        |

167 D<sup>b</sup> peptides (ERAAP-deficient spleen cells)

| Accession # | Peptides |   |   |   |   |   |   |   |   |    |          |                                            |                                                                            | Bulge                                                | m/z                                                                | Protein entry name                                   |                                 |
|-------------|----------|---|---|---|---|---|---|---|---|----|----------|--------------------------------------------|----------------------------------------------------------------------------|------------------------------------------------------|--------------------------------------------------------------------|------------------------------------------------------|---------------------------------|
|             | 1        | 2 | 3 | 4 | 5 | 6 | 7 | 8 | 9 | 10 | 11       | 12                                         | 13                                                                         |                                                      |                                                                    |                                                      |                                 |
| Q99LH1      | A        | S | L | T | N | P | F | G | K | G  | A        | F                                          | I                                                                          | N-                                                   | C-                                                                 | 1322.711                                             | Nucleolar GTP-binding protein 2 |
| P14206      | V        | A | I | E | N | P | A | D | V | S  | V        | I                                          | X                                                                          | X                                                    | 1226.663                                                           | 40S ribosomal protein SA                             |                                 |
| Q80TP3      | A        | A | L | E | A | S | N | A | S | S  | Y        | L                                          | X                                                                          | X                                                    | 1196.58                                                            | E3 ubiquitin-protein ligase UBR5                     |                                 |
| Q64253      | A        | G | F | G | N | V | N | L | G | Y  | T        | L                                          | X                                                                          | X                                                    | 1225.622                                                           | Lymphocyte antigen 6E precursor                      |                                 |
| Q88554      | T        | G | I | L | N | P | E | G | Y | T  | L        | L                                          | X                                                                          | X                                                    | 1177.611                                                           | Poly [ADP-ribose] polymerase 14                      |                                 |
| Q8CHW4      | R        | V | F | Q | N | E | V | L | G | T  | L        | L                                          | X                                                                          | X                                                    | 1275.706                                                           | Translation initiation factor eIF-2B subunit epsilon |                                 |
| Q35737      | F        | S | P | L | N | P | V | R | V | H  | I        | L                                          | X                                                                          | X                                                    | 1278.732                                                           | Heterogeneous nuclear ribonucleoprotein H            |                                 |
| Q6PNC0      | V        | A | P | A | N | S | L | V | H | A  | F        | I                                          | X                                                                          | X                                                    | 1125.606                                                           | DmX-like protein 1                                   |                                 |
| P97823      | K        | A | L | I | N | P | A | N | V | T  | F        | I                                          | X                                                                          | X                                                    | 1187.679                                                           | Acyl-protein thioesterase 1                          |                                 |
| Q8BIF9      | A        | S | H | E | N | P | V | D | I | L  | L        | L                                          | X                                                                          | X                                                    | 1207.632                                                           | Zinc finger protein 787                              |                                 |
| Q921T1      | A        | A | P | Q | N | F | T | P | S | M  | I        | L                                          | X                                                                          | X                                                    | 1176.572                                                           | AP-3 complex subunit beta-1                          |                                 |
| P30999      | S        | A | V | S | N | N | Y | I | Q | T  | L        | X                                          | X                                                                          | 1209.612                                             | Catenin delta-1                                                    |                                                      |                                 |
| Q01237      | S        | G | P | T | N | E | D | L | Y | I  | L        | X                                          | X                                                                          | 1108.527                                             | 3-hydroxy-3-methylglutaryl-coenzyme A reductase                    |                                                      |                                 |
| Q07174      | I        | S | P | Q | N | G | R | Y | Q | T  | L        | X                                          | X                                                                          | 1175.617                                             | Mitogen-activated protein kinase kinase kinase 8                   |                                                      |                                 |
| Q80YV3      | S        | A | I | I | N | L | F | H | L | I  | L        | X                                          | X                                                                          | 1140.678                                             | Transformation/transcription domain-associated protein             |                                                      |                                 |
| Q8BJU0      | A        | G | L | L | N | N | P | H | F | I  | L        | X                                          | X                                                                          | 1095.595                                             | Small glutamine-rich tetratricopeptide repeat-containing protein A |                                                      |                                 |
| Q8JZW4      | Q        | S | Q | F | N | I | Y | E | V | I  | L        | X                                          | X                                                                          | 1240.629                                             | Copine-5                                                           |                                                      |                                 |
| Q99N16      | S        | A | Y | L | N | M | F | E | H | I  | L        | X                                          | X                                                                          | 1224.572                                             | Cytochrome P450 4F3                                                |                                                      |                                 |
| Q9VWJ0      | V        | V | F | G | N | V | T | A | I | L  | X        | X                                          | 1032.594                                                                   | Potassium voltage-gated channel subfamily H member 3 |                                                                    |                                                      |                                 |
| Q88545      | N        | Q | F | V | N | K | F | N | V | L  | X        | X                                          | 1222.658                                                                   | COP9 signalosome complex subunit 6                   |                                                                    |                                                      |                                 |
| P13864      | L        | S | L | E | N | G | T | H | T | L  | X        | X                                          | 1084.564                                                                   | DNA                                                  |                                                                    |                                                      |                                 |
| P20029      | I        | T | I | L | N | D | Q | N | R | L  | X        | X                                          | 1187.638                                                                   | 78 kDa glucose-regulated protein precursor           |                                                                    |                                                      |                                 |
| P70168      | A        | A | V | E | N | L | P | T | F | L  | X        | X                                          | 1074.584                                                                   | Importin subunit beta-1                              |                                                                    |                                                      |                                 |
| P97376      | H        | A | L | D | N | G | L | F | T | L  | X        | X                                          | 1100.574                                                                   | Protein FRG1                                         |                                                                    |                                                      |                                 |
| Q00175      | V        | G | L | P | N | E | D | Q | A | L  | X        | X                                          | 1027.546                                                                   | Progesterone receptor                                |                                                                    |                                                      |                                 |
| Q61026      | S        | S | V | S | N | V | N | L | T | L  | X        | X                                          | 1033.553                                                                   | Nuclear receptor coactivator 2                       |                                                                    |                                                      |                                 |
| Q8BK67      | A        | A | Y | R | N | L | G | Q | N | L  | X        | X                                          | 1119.591                                                                   | Protein RCC2                                         |                                                                    |                                                      |                                 |
| Q9JIM1      | S        | A | I | F | N | V | M | T | L | X  | X        | 1109.566                                   | Equilibrative nucleoside transporter 1                                     |                                                      |                                                                    |                                                      |                                 |
| Q9JMG2      | A        | V | I | E | N | L | K | Y | F | L  | X        | X                                          | 1209.688                                                                   | C1GALT1-specific chaperone 1                         |                                                                    |                                                      |                                 |
| Q60754      | T        | G | I | Q | G | Q | K | G | T | K  | G        | E                                          |                                                                            |                                                      | 1203.633                                                           | Macrophage receptor MARCO                            |                                 |
| Q8JZP2      | F        | S | E | L | N | L | A | A | Y | V  | T        | G                                          | G                                                                          |                                                      |                                                                    | 1341.669                                             | Synapsin-3                      |
| O08715      | E        | L | S | L | M | G | D | K | A | K  | S        | I                                          |                                                                            |                                                      | 1291.726                                                           | A kinase anchor protein 1, mitochondrial precursor   |                                 |
| Q9QXM0      | K        | S | P | T | A | P | P | D | L | Y  | F        |                                            |                                                                            | 1235.631                                             | Abhydrolase domain-containing protein 2                            |                                                      |                                 |
| P70424      | A        | E | Q | R | A | S | P | V | T | F  | I        |                                            |                                                                            | 1218.648                                             | Receptor tyrosine-protein kinase erbB-2 precursor                  |                                                      |                                 |
| P08003      | S        | K | F | D | V | S | G | Y | P | T  | I        |                                            |                                                                            | 1213.611                                             | Protein disulfide-isomerase A4 precursor                           |                                                      |                                 |
| P53496      | K        | S | Y | E | L | P | D | G | Q | V  | I        |                                            |                                                                            | 1248.648                                             | Actin-11                                                           |                                                      |                                 |
| P80313      | L        | V | S | N | I | S | A | C | Q | V  | I        |                                            |                                                                            | 1146.619                                             | T-complex protein 1 subunit eta                                    |                                                      |                                 |
| Q3U1N2      | A        | A | V | Q | N | P | A | L | T | A  | L        | L                                          |                                                                            |                                                      | 1068.605                                                           | Sterol regulatory element-binding protein 2          |                                 |
| Q8BK77      | Y        | Q | F | D | K | V | G | I | L | T  | L        |                                            |                                                                            | 1296.72                                              | THO complex subunit 5 homolog                                      |                                                      |                                 |
| Q3THE2      | S        | L | G | K | N | P | T | D | A | Y  | L        |                                            |                                                                            | 1178.606                                             | Myosin regulatory light chain 2-B, smooth muscle isoform           |                                                      |                                 |
| Q60611      | S        | S | I | V | N | S | T | Y | Y | A  |          |                                            | 1104.521                                                                   | DNA-binding protein SATB1                            |                                                                    |                                                      |                                 |
| Q80VH0      | N        | S | P | F | N | S | K | F | P | A  |          |                                            | 1108.543                                                                   | B-cell scaffold protein with ankyrin repeats         |                                                                    |                                                      |                                 |
| Q91WG4      | S        | A | P | R | N | F | V | E | N | F  |          |                                            | 1180.575                                                                   | Elongator complex protein 2                          |                                                                    |                                                      |                                 |
| P16277      | R        | S | L | D | N | G | G | Y | Y | I  |          |                                            | 1157.559                                                                   | Tyrosine-protein kinase BLK                          |                                                                    |                                                      |                                 |
| P61161      | Y        | A | G | S | N | F | P | E | H | I  |          |                                            | 1134.522                                                                   | Actin-related protein 2                              |                                                                    |                                                      |                                 |
| Q8BK5       | N        | T | N | L | P | K | I | F | S | I  |          |                                            | 1146.652                                                                   | Importin subunit beta-3                              |                                                                    |                                                      |                                 |
| Q9CS72      | A        | M | S | P | V | T | I | T | I |    |          | 1033.56                                    | Filamin-A-interacting protein 1                                            |                                                      |                                                                    |                                                      |                                 |
| P51943      | V        | S | L | L | N | P | P | E | T | L  |          |                                            | 1082.61                                                                    | Cyclin-A2                                            |                                                                    |                                                      |                                 |
| P54775      | M        | V | S | T | I | D | R | E | L | L  |          |                                            | 1176.63                                                                    | 26S protease regulatory subunit 6B                   |                                                                    |                                                      |                                 |
| P58064      | S        | A | V | E | N | I | L | E | H | L  |          |                                            | 1124.595                                                                   | Mitochondrial 28S ribosomal protein S6               |                                                                    |                                                      |                                 |
| Q501J6      | A        | T | P | G | R | L | I | D | F | L  |          |                                            | 1102.626                                                                   | Probable ATP-dependent RNA helicase DDX17            |                                                                    |                                                      |                                 |
| Q63870      | V        | E | Q | T | L | H | P | I | L |    |          | 1162.691                                   | Collagen alpha-1(VII) chain precursor                                      |                                                      |                                                                    |                                                      |                                 |
| Q8C0L9      | F        | G | I | H | N | G | V | E | T | L  |          |                                            | 1086.558                                                                   | Putative glycerophosphodiester phosphodiesterase 5   |                                                                    |                                                      |                                 |
| Q8R1B8      | F        | A | K | N | L | C | S | L | Q | L  |          |                                            | 1136.595                                                                   | Nuclear receptor ROR-beta                            |                                                                    |                                                      |                                 |
| Q99PL5      | S        | S | I | V | N | S | I | Q | V | L  |          |                                            | 1059.605                                                                   | Ribosome-binding protein 1                           |                                                                    |                                                      |                                 |
| Q9CQG2      | T        | A | I | E | N | S | W | I | H | L  |          |                                            | 1183.611                                                                   | Putative methyltransferase METT10D                   |                                                                    |                                                      |                                 |
| Q9D3G9      | Y        | S | V | A | N | H | N | S | F | L  |          |                                            | 1151.549                                                                   | Rho-related GTP-binding protein RhoH precursor       |                                                                    |                                                      |                                 |
| Q9D710      | A        | A | P | A | P | S | L | W | T | L  |          |                                            | 1026.562                                                                   | Scotin precursor                                     |                                                                    |                                                      |                                 |
| Q9DB00      | N        | A | P | Q | N | P | E | S | K | L  |          |                                            | 1097.559                                                                   | GON-4-like protein                                   |                                                                    |                                                      |                                 |
| P84309      | L        | M | L | A | I | E | F | I | Y | V  |          |                                            | 1211.675                                                                   | Adenylate cyclase type 5                             |                                                                    |                                                      |                                 |
| Q9JHC9      | S        | A | P | S | A | I | A | L | P | V  |          |                                            | 925.536                                                                    | ETS-related transcription factor Elf-2               |                                                                    |                                                      |                                 |
| P01887      | I        | Q | K | T | P | Q | I | Q | V | Y  |          |                                            | 1217.689                                                                   | Beta-2-microglobulin precursor                       |                                                                    |                                                      |                                 |
| O35114      | K        | S | V | I | N | T | T | L | V |    |          | 974.589                                    | Lysosome membrane protein 2                                                |                                                      |                                                                    |                                                      |                                 |
| O35127      | S        | A | P | E | N | A | V | R | M |    |          | 974.473                                    | Protein C10                                                                |                                                      |                                                                    |                                                      |                                 |
| O35737      | F        | S | P | L | N | P | V | R | V |    |          | 1028.589                                   | Heterogeneous nuclear ribonucleoprotein H                                  |                                                      |                                                                    |                                                      |                                 |
| O88491      | A        | S | M | I | N | V | E | Y | L |    |          | 1039.513                                   | Histone-lysine N-methyltransferase, H3 lysine-36 and H4 lysine-20 specific |                                                      |                                                                    |                                                      |                                 |
| O88904      | S        | L | L | T | N | H | V | T | L |    |          | 997.568                                    | Homeodomain interacting protein kinase 1                                   |                                                      |                                                                    |                                                      |                                 |
| P01899      | F        | A | Y | E | G | R | D | Y | I |    |          | 1133.527                                   | H-2 class I histocompatibility antigen, D-B alpha chain precursor          |                                                      |                                                                    |                                                      |                                 |
| P04441      | S        | Q | M | R | M | A | T | P | L |    |          | 1034.513                                   | H 2 class II histocompatibility antigen gamma chain                        |                                                      |                                                                    |                                                      |                                 |
| P07724      | E        | T | Y | V | P | K | E | F |   |    | 1012.499 | Serum albumin precursor                    |                                                                            |                                                      |                                                                    |                                                      |                                 |
| P07742      | F        | Q | I | V | N | P | H | L | L |    |          | 1080.621                                   | Ribonucleoside-diphosphate reductase large subunit                         |                                                      |                                                                    |                                                      |                                 |
| P09581      | F        | A | P | K | N | I | Y | S | I |    |          | 1052.578                                   | Macrophage colony-stimulating factor 1 receptor precursor                  |                                                      |                                                                    |                                                      |                                 |
| P14206      | A        | S | Y | V | N | L | P | T | I |    |          | 977.531                                    | 40S ribosomal protein SA                                                   |                                                      |                                                                    |                                                      |                                 |
| P14576      | A        | T | I | N | E | E | V | L |   |    | 1001.552 | Signal recognition particle 54 kDa protein |                                                                            |                                                      |                                                                    |                                                      |                                 |
| P14901      | I        | Q | A | E | N | A | E | F | M |    |          | 1052.472                                   | Heme oxygenase 1                                                           |                                                      |                                                                    |                                                      |                                 |
| P16546      | K        | A | L | I | N | A | D | E | L |    |          | 986.552                                    | Spectrin alpha chain, brain                                                |                                                      |                                                                    |                                                      |                                 |
| P17918      | A        | M | G | V | N | L | T | S | M |    |          | 923.433                                    | Proliferating cell nuclear antigen                                         |                                                      |                                                                    |                                                      |                                 |
| P19137      | E        | L | Q | S | R | A | G | A | L |    |          | 944.516                                    | Laminin subunit alpha-1 precursor                                          |                                                      |                                                                    |                                                      |                                 |
| P24547      | G        | G | I | Q | N | V | G | H | I |    |          | 894.48                                     | Inosine 5' monophosphate dehydrogenase 2                                   |                                                      |                                                                    |                                                      |                                 |
| P28063      | G        | G | V | V | N | M | Y | H | M |    |          | 1007.444                                   | Proteasome subunit beta type-8 precursor                                   |                                                      |                                                                    |                                                      |                                 |
| P28658      | N        | S | I | R | N | L | D | T | I |    |          | 1045.564                                   | Ataxin-10                                                                  |                                                      |                                                                    |                                                      |                                 |
| P30282      | A        | A | V | I | A | H | D | F | L |    |          | 956.52                                     | G1/S-specific cyclin-D3                                                    |                                                      |                                                                    |                                                      |                                 |
| P31230      | S        | G | L | V | N | H | V | P | L |    |          | 935.531                                    | Multisynthetase complex auxiliary component p43                            |                                                      |                                                                    |                                                      |                                 |
| P35278      | A        | M | N | V | N | E | I | F | M |    |          | 1068.486                                   | Ras-related protein Rab-5C                                                 |                                                      |                                                                    |                                                      |                                 |
| P35396      | F        | V | I | H | D | I | E | T | L |    |          | 1086.584                                   | Peroxisome proliferator-activated receptor delta                           |                                                      |                                                                    |                                                      |                                 |
| P40142      | T        | R | K | A | Y | G | L | A | L |    |          | 992.589                                    | Transketolase                                                              |                                                      |                                                                    |                                                      |                                 |
| P42228      | S        | I | L | V | N | Q | E | V | L |    |          | 1014.584                                   | Signal transducer and activator of transcription 4                         |                                                      |                                                                    |                                                      |                                 |
| P46414      | F        | G | P | V | N | H | E | E | L |    |          | 1041.501                                   | Cyclin-dependent kinase inhibitor 1B                                       |                                                      |                                                                    |                                                      |                                 |
| P49718      | A        | A | L | P | N | I | Y | E | L |    |          | 1003.546                                   | DNA replication licensing factor MCM5                                      |                                                      |                                                                    |                                                      |                                 |
| P49813      | S        | S | I | V | N | K | E | G | L |    |          | 946.521                                    | Tropomodulin 1                                                             |                                                      |                                                                    |                                                      |                                 |
| P54823      | I        | N | F | D | F | P | K | L |   |    | 993.541  | Probable ATP-dependent RNA helicase DDX6   |                                                                            |                                                      |                                                                    |                                                      |                                 |
| P55194      | A        | L | I | Q | N | A | D | T | L |    |          | 958.521                                    | SH3 domain-binding protein 1                                               |                                                      |                                                                    |                                                      |                                 |
| P55264      | S        | A | V | V | D | K | D | F | L |    |          | 993.526                                    | Adenosine kinase                                                           |                                                      |                                                                    |                                                      |                                 |
| P55264      | S        | A | V | V | D | K | D | F | L |    |          | 993.526                                    | Adenosine kinase                                                           |                                                      |                                                                    |                                                      |                                 |
| P59326      | G        | S | V | V | N | S | V | A | L |    |          | 845.473                                    | YTH domain family protein 1                                                |                                                      |                                                                    |                                                      |                                 |
| P70168      | A        | A | L | Q | N | L | V | K | I |    |          | 969.61                                     | Importin subunit beta-1                                                    |                                                      |                                                                    |                                                      |                                 |
| P70428      | A        | S | V | S | N | P | L | F | L |    |          | 947.52                                     | Exostosin-2                                                                |                                                      |                                                                    |                                                      |                                 |
| P70436      | E        | R | A | Q | L | A | A | Q | L |    |          | 999.559                                    | Homeobox protein DLX-4                                                     |                                                      |                                                                    |                                                      |                                 |
| P82198      | V        | S | N | V | N | I | E | L | V |    |          | 1000.568                                   | Transforming growth factor-beta-induced protein ig-h3 precursor            |                                                      |                                                                    |                                                      |                                 |
| Q02257      | S        | S | V | E | N | I | Q | R | V |    |          | 1031.549                                   | Junction plakoglobin                                                       |                                                      |                                                                    |                                                      |                                 |
| Q3UM45      | R        | A | I | E | N | I | D | T | L |    |          | 1044.569                                   | Protein phosphatase 1 regulatory subunit 7                                 |                                                      |                                                                    |                                                      |                                 |

|         |                   |          |                                                                                                                             |
|---------|-------------------|----------|-----------------------------------------------------------------------------------------------------------------------------|
| Q3UM45  | R A I E N I D T L | 1044.569 | Protein phosphatase 1 regulatory subunit 7                                                                                  |
| Q3UMF0  | D I N N I L E S K | 1045.553 | Cordon-bleu protein-like 1                                                                                                  |
| Q4JIM5  | S S L I N G S F L | 937.5    | Tyrosine-protein kinase ABL2                                                                                                |
| Q5SPL2  | A S I E N T S T L | 935.469  | PHD finger protein 12                                                                                                       |
| Q60520  | L V I F N Q E V I | 1074.62  | Paired amphipathic helix protein Sin3a                                                                                      |
| Q60597  | S A P V A A E P F | 888.447  | 2-oxoglutarate dehydrogenase E1 component, mitochondrial precursor                                                          |
| Q60611  | R A M Q N F L Q L | 1120.589 | DNA-binding protein SATB1                                                                                                   |
| Q60695  | N S Q V N F D F I | 1083.511 | Ral guanine nucleotide dissociation stimulator-like 1                                                                       |
| Q61081  | N M P W N V D T L | 1089.504 | Hsp90 co-chaperone Cdc37                                                                                                    |
| Q61168  | F N I R V A T T I | 933.552  | Lysosomal-associated transmembrane protein 5                                                                                |
| Q64511  | N S M V L F D H M | 1093.481 | DNA topoisomerase 2 beta                                                                                                    |
| Q6EBV9  | L Q L R H F N E   | 1056.559 | Autophagy-related protein 9B                                                                                                |
| Q6PGC1  | K S L E N I L T L | 1030.626 | Putative ATP-dependent RNA helicase DHX29                                                                                   |
| Q6WKZ8  | S L P T N L I H L | 1007.589 | E3 ubiquitin-protein ligase UBR2                                                                                            |
| Q7TMR0  | Q S L T N I L H L | 1038.595 | Lysosomal Pro-X carboxypeptidase precursor                                                                                  |
| Q7TSS2  | S A L H N D L Q I | 1010.552 | Ubiquitin-conjugating enzyme E2 Q                                                                                           |
| Q80U16  | S A L E S F D F L | 1028.494 | Protein FAM65B                                                                                                              |
| Q80V11  | A A L Q N A V A F | 904.489  | Tripartite motif-containing protein 56                                                                                      |
| Q80YQ2  | T A L R L I T A L | 971.625  | Mediator of RNA polymerase II transcription subunit 23                                                                      |
| Q8BG67  | S A I I N E D N L | 988.495  | Protein EFR3 homolog A                                                                                                      |
| Q8BHY8  | I G P K N Y E F L | 1080.573 | Sorting nexin-14                                                                                                            |
| Q8BNV1  | A A P F D T V H I | 970.5    | HpaII tiny fragments locus 9c protein                                                                                       |
| Q8BPB0  | S A P K Y I D Y L | 1069.557 | Mps one binder kinase activator-like 1A                                                                                     |
| Q8BPS4  | S A L A N Y I H L | 1001.542 | Integral membrane protein GPR180 precursor                                                                                  |
| Q8BPS4  | S A L A N Y I H L | 1001.542 | Integral membrane protein GPR180 precursor                                                                                  |
| Q8BQM4  | V S L L D I D H L | 1024.568 | HEAT repeat-containing protein 3                                                                                            |
| Q8BW56  | S S V L N L T E L | 975.536  | Glycosyltransferase-like domain-containing protein 1                                                                        |
| Q8BZQ7  | A M L T N L E S L | 991.513  | Anaphase-promoting complex subunit 2                                                                                        |
| Q8C3J5  | S M V Q N R V F L | 1093.583 | Dedicator of cytokinesis protein 2                                                                                          |
| Q8C3J5  | K S V E N F V S L | 1022.552 | Dedicator of cytokinesis protein 2                                                                                          |
| Q8C4V1  | M G I L N T D T L | 977.498  | Rho GTPase-activating protein 24                                                                                            |
| Q8CHI8  | A Q P V N V Q Q L | 996.548  | E1A-binding protein p400                                                                                                    |
| Q8VE65  | S A L I N L S Q F | 951.515  | Transcription initiation factor TFIID subunit 12                                                                            |
| Q8VIJ8  | S A V K N L Q Q L | 1000.568 | Protein C16orf35 homolog                                                                                                    |
| Q91W50  | V S A R N I M L L | 1016.593 | Cold shock domain-containing protein E1                                                                                     |
| Q91WM3  | A A L L N T D L V | 929.531  | U3 small nucleolar RNA-interacting protein 2                                                                                |
| Q91XQ0  | S S L M L E S F F | 1060.503 | Dynein heavy chain 8, axonemal                                                                                              |
| Q91ZU1  | L G I Q D L E R Q | 1071.58  | Ankyrin repeat and SOCS box protein 6                                                                                       |
| Q99JF5  | T A P V N I A V I | 897.541  | Diphosphomevalonate decarboxylase                                                                                           |
| Q99KD5  | S G L Q N F E A L | 978.49   | UNC45 homolog A                                                                                                             |
| Q99KV1  | M A P Q N L S T F | 1008.482 | DnaJ homolog subfamily B member 11 precursor                                                                                |
| Q99N32  | V S L N L R Q V L | 1041.642 | Beta-klotho                                                                                                                 |
| Q99NH0  | A S V L N V N H I | 966.537  | Ankyrin repeat domain-containing protein 17                                                                                 |
| Q9CR64  | S A I F N F Q S L | 1026.526 | Transmembrane protein 167 precursor                                                                                         |
| Q9D020  | G A L K N T D Y F | 1028.505 | Cytosolic 5'-nucleotidase 3                                                                                                 |
| Q9D2G2  | P R V L L L D L   | 938.604  | Dihydrodipolyllysine-residue succinyltransferase component of 2-oxoglutarate dehydrogenase complex, mitochondrial precursor |
| Q9D2L9  | A G V S N I I E F | 949.5    | Protein FAM111A                                                                                                             |
| Q9D868  | S S P V N P V E F | 945.505  | Peptidyl-prolyl cis-trans isomerase H                                                                                       |
| Q9D8P7  | S G I I D S D F L | 966.478  | General transcription factor 3C polypeptide 6                                                                               |
| Q9DB40  | S G L L N Q Q S L | 959.527  | Mediator of RNA polymerase II transcription subunit 27                                                                      |
| Q9DBN5  | V G V N N P V F L | 958.536  | Peroxisomal Lon protease homolog 2                                                                                          |
| Q9DBR3  | G A V Q N I A H L | 922.511  | Armadillo repeat-containing protein 8                                                                                       |
| Q9EQU3  | L G L S N L T H L | 967.558  | Toll-like receptor 9 precursor                                                                                              |
| Q9ES97  | G A V F N G I T L | 891.494  | Reticulon-3                                                                                                                 |
| Q9ET01  | V G V E N V A E L | 929.494  | Glycogen phosphorylase, liver form                                                                                          |
| Q9JJ28  | A A L K L G Q E L | 942.562  | Protein flightless-1 homolog                                                                                                |
| Q9JJG9  | V S R D Q Y L E L | 1122.58  | Uncharacterized protein C4orf14 homolog                                                                                     |
| Q9JLV6  | A A E G Y K L V I | 963.552  | Bifunctional polynucleotide phosphatase/kinase                                                                              |
| Q9QWT9  | G A P L N L V D L | 911.52   | Kinesin-like protein KIFC1                                                                                                  |
| Q9QXB9  | G M K L N L D Y L | 1066.561 | Developmentally-regulated GTP-binding protein 2                                                                             |
| Q9WTK5  | A A L Q N L E Q L | 999.548  | Nuclear factor NF-kappa-B p100 subunit                                                                                      |
| Q9WTTU0 | L N V T N L E F L | 949.5    | PHD finger protein 2                                                                                                        |
| Q9Z1E3  | A I V E H L V T L | 994.594  | NF-kappa-B inhibitor alpha                                                                                                  |
| Q9Z2U1  | S L I I L K Q V M | 1044.649 | Proteasome subunit alpha type-5                                                                                             |



233 K<sup>b</sup> peptides (C57BL/6 spleen cells)

| Accession # | Peptides |   |   |   |   |   |   |   |   |    | Bulge | m/z      | Protein entry name                                                           |
|-------------|----------|---|---|---|---|---|---|---|---|----|-------|----------|------------------------------------------------------------------------------|
|             | 1        | 2 | 3 | 4 | 5 | 6 | 7 | 8 | 9 | 10 |       |          |                                                                              |
| Q9CR08      | V        | I | L | E | Y | F | T | R | L |    | X     | 1153.662 | Ribonuclease P protein subunit p29                                           |
| Q8ROS2      | V        | T | Y | S | F | R | Q | S | F |    | X     | 1134.558 | IQ motif and Sec7 domain-containing protein 1                                |
| Q91YE5      | T        | I | V | E | F | L | H | S | F |    | X     | 1092.573 | Bromodomain adjacent to zinc finger domain protein 2A                        |
| Q99PN3      | L        | I | Y | T | F | T | T | T | F |    | X     | 1106.577 | Tripartite motif-containing protein 26                                       |
| Q571H0      | A        | V | I | Q | F | L | E | R | F |    | X     | 1088.658 | Nucleolar pre-ribosomal-associated protein 1                                 |
| Q9D2C7      | R        | S | Y | L | F | L | G | G | I |    | X     | 1025.578 | Bax inhibitor 1                                                              |
| Q8CF17      | I        | G | P | T | Y | Y | Q | R | L |    | X     | 1110.595 | DNA-directed RNA polymerase II subunit RPB2                                  |
| Q8K4L0      | H        | H | A | E | Y | L | T | E | L |    | X     | 1112.538 | ATP-dependent RNA helicase DDX54                                             |
| Q8VDD5      | R        | V | A | E | F | T | T | N | L |    | X     | 1050.558 | Myosin-9                                                                     |
| Q8VEW6      | F        | T | L | S | F | V | S | F | L |    | X     | 1060.572 | Olfactory receptor 510                                                       |
| Q91VV4      | V        | I | Y | P | F | M | Q | G | L |    | X     | 1067.567 | DENN domain-containing protein 2D                                            |
| Q8JKN1      | V        | L | A | G | F | V | N | G | L |    | X     | 889.515  | Zinc transporter 7                                                           |
| Q9OUK4      | S        | L | I | L | F | S | T | R | L |    | X     | 1049.636 | Baculoviral IAP repeat-containing protein 1b                                 |
| Q9Z1R2      | S        | I | A | A | F | I | Q | R | L |    | X     | 1018.605 | Large proline-rich protein BAT3                                              |
| Q35218      | I        | Q | A | E | F | V | G | G | V |    | X     | 919.489  | Cleavage and polyadenylation specificity factor subunit 2                    |
| Q9CQ20      | A        | M | Y | I | F | L | H | T | V |    | X     | 1094.571 | ORM1-like protein 2                                                          |
| Q8BVK9      | V        | N | L | R | E | Y | P | S | L |    | X     | 1090.59  | Sp110 nuclear body protein                                                   |
| Q99388      | V        | N | M | E | K | Y | P | D | L |    | X     | 1108.535 | Component of Sp100-rs                                                        |
| Q8BLB7      | I        | T | P | P | G | Y | S | H | V |    | X     | 970.5    | Lethal (3)malignant brain tumor-like 3 protein                               |
| P97412      | V        | L | V | N | H | P | S | P | A | I  |       | 1046.6   | Lysosomal-traffic regulator                                                  |
| Q9JUX7      | T        | V | I | F | A | G | D | T | N | L  |       | 1050.547 | TRAF and TNF receptor-associated protein                                     |
| P11610      | P        | S | S | A | H | G | H | L | Q | L  |       | 1046.527 | T-cell surface glycoprotein CD1d2 precursor                                  |
| Q99KU6      | R        | E | L | F | P | V | F | T | Q | L  |       | 1249.695 | Uncharacterized protein C6orf89 homolog                                      |
| Q8BGF7      | Q        | A | E | H | N | L | S | S | V | L  |       | 1097.559 | PAB-dependent poly(A)-specific ribonuclease subunit 2                        |
| P01887      | I        | Q | K | T | P | Q | I | Q | V | Y  |       | 1217.689 | Beta-2-microglobulin precursor                                               |
| P70412      | S        | L | V | V | F | L | D | T | C |    |       | 996.508  | CUB and zona pellucida-like domain-containing protein 1 precursor            |
| Q8R3P7      | F        | K | F | D | L | G | S | K | I |    |       | 1054.594 | Clusterin-associated protein 1                                               |
| Q99MB1      | L        | T | K | N | H | I | S | K | I |    |       | 1053.642 | Toll-like receptor 3 precursor                                               |
| Q9D2X8      | T        | I | L | C | L | H | K | L | I |    |       | 1053.649 | Uncharacterized protein C8orf76 homolog                                      |
| Q9D4M9      | V        | N | F | S | D | P | E | L | I |    |       | 1033.521 | Putative polypeptide N-acetylgalactosaminyltransferase-like protein 5        |
| P04441      | S        | G | P | L | E | Y | P | Q | L |    |       | 1003.51  | H-2 class II histocompatibility antigen gamma chain                          |
| P08775      | V        | N | Y | R | H | L | A | L | L |    |       | 1098.642 | DNA-directed RNA polymerase II subunit RPB1                                  |
| P14685      | R        | V | Y | E | F | L | D | K | L |    |       | 1182.677 | 26S proteasome non-ATPase regulatory subunit 3                               |
| P46978      | A        | V | L | S | F | S | T | R | L |    |       | 993.573  | Dolichyl-diphosphooligosaccharide--protein glycosyltransferase subunit STT3A |
| P54227      | S        | S | D | I | Q | V | K | E | L |    |       | 1018.542 | Stathmin                                                                     |
| Q01341      | F        | V | G | N | V | L | L | S | L |    |       | 961.572  | Adenylate cyclase type 6                                                     |
| Q8BW96      | K        | I | F | E | F | K | E | T | L |    |       | 1154.646 | Calcium/calmodulin-dependent protein kinase type 1D                          |
| Q8BYK6      | G        | V | F | S | Q | P | G | A | L |    |       | 875.463  | YTH domain family protein 3                                                  |
| Q8R3L2      | R        | N | Y | E | Y | L | I | R | L |    |       | 1239.685 | Transcription factor 25                                                      |
| Q99ME9      | Q        | I | L | S | D | F | P | K | L |    |       | 1060.604 | Nucleolar GTP-binding protein 1                                              |
| Q9CR67      | Q        | S | I | A | F | I | S | R | L |    |       | 1034.6   | Transmembrane protein 33                                                     |
| Q9D1G0      | Y        | G | F | V | S | K | P | L |   |    |       | 997.536  | Deoxyribonuclease I-like 2 precursor                                         |
| Q9D1R2      | Q        | P | L | A | S | G | S | F | L |    |       | 919.489  | Protein KTI12 homolog                                                        |
| Q9JHU4      | A        | S | Y | E | F | V | Q | R | L |    |       | 1112.574 | Dynein heavy chain 1, cytoplasmic 1                                          |
| Q8BHW2      | V        | L | N | D | I | I | S | T | M |    |       | 1005.529 | Protein OSCP1                                                                |
| Q8CG20      | K        | S | Y | S | F | I | A | R | M |    |       | 1102.572 | Calcium homeostasis endoplasmic reticulum protein                            |
| O88799      | V        | L | L | S | P | L | S | H | S |    |       | 952.518  | Zonahesin precursor                                                          |
| Q8C0F9      | L        | V | Y | R | F | C | S | V | S |    |       | 1073.545 | Inactive serine protease 35 precursor                                        |
| Q3TTA7      | L        | S | P | P | P | P | V | T | T |    |       | 908.509  | E3 ubiquitin-protein ligase CBL-B                                            |
| Q8CG08      | A        | S | V | I | G | V | F | I | T |    |       | 906.53   | Sodium/potassium/calcium exchanger 4 precursor                               |
| Q07113      | V        | L | G | I | G | K | T | F | V |    |       | 933.577  | Cation-independent mannose-6-phosphate receptor precursor                    |
| Q8K2H4      | I        | N | Q | I | Y | E | A | R | V |    |       | 1105.601 | Centaurin-beta-1                                                             |
| A2AKX3      | V        | G | L | L | Y | R | L | L |   |    |       | 946.609  | Probable helicase senataxin                                                  |
| A2APV2      | L        | Q | Y | E | F | T | K | L |   |    |       | 1041.562 | Formin-like protein 2                                                        |
| O08575      | T        | I | I | I | F | H | S | L |   |    |       | 943.562  | Eyes absent homolog 2                                                        |
| O08739      | Y        | S | E | P | R | L | S | I |   |    |       | 964.51   | AMP deaminase 3                                                              |
| O35900      | S        | V | V | R | Y | V | Q | L |   |    |       | 963.552  | U6 snRNA-associated Sm-like protein LSm2                                     |
| O44440      | R        | A | Y | L | F | N | S | V |   |    |       | 969.505  | Protein yippee-like 4                                                        |
| O54692      | S        | T | V | E | F | T | N | L |   |    |       | 910.452  | Centromere/kinetochore protein zw10 homolog                                  |
| O55013      | S        | A | L | I | Y | S | N | L |   |    |       | 880.478  | Trafficking protein particle complex subunit 3                               |
| O70310      | A        | A | Y | S | F | Y | N | V |   |    |       | 934.431  | Glycylpeptide N-tetradecanoyltransferase 1                                   |
| P14901      | Q        | N | P | V | Y | A | P | L |   |    |       | 901.478  | Heme oxygenase 1                                                             |
| P15066      | E        | T | P | V | Y | A | N | L |   |    |       | 906.457  | Transcription factor jun-D                                                   |
| P15307      | T        | T | L | I | F | Q | K | L |   |    |       | 963.588  | C-Rel proto-oncogene protein                                                 |
| P21278      | L        | V | D | Y | F | P | E | F |   |    |       | 1029.493 | Guanine nucleotide-binding protein alpha-11 subunit                          |
| P21995      | V        | A | P | G | F | P | L | L |   |    |       | 829.482  | Embigin precursor                                                            |
| P22366      | S        | I | L | R | F | I | T | I |   |    |       | 962.604  | Myeloid differentiation primary response protein MyD88                       |
| P23116      | Q        | S | I | E | F | S | R | L |   |    |       | 979.521  | Eukaryotic translation initiation factor 3 subunit A                         |
| P25425      | L        | F | L | N | P | Q | N | L |   |    |       | 958.536  | POU domain, class 2, transcription factor 1                                  |
| P28076      | V        | N | R | V | F | D | K | L |   |    |       | 990.574  | Proteasome subunit beta type 9 precursor                                     |
| P28660      | V        | I | L | S | F | R | S | L |   |    |       | 934.573  | Nck-associated protein 1                                                     |
| P29351      | A        | Q | Y | K | F | I | Y | V |   |    |       | 1031.557 | Tyrosine-protein phosphatase non-receptor type 6                             |
| P32233      | A        | A | Y | E | F | T | L |   |   |    |       | 915.446  | Developmentally-regulated GTP-binding protein 1                              |
| P33215      | Y        | S | L | F | R | K | S | L |   |    |       | 1013.578 | Protein NEDD1                                                                |
| P35396      | S        | Q | Y | L | F | P | K | L |   |    |       | 995.557  | Peroxisome proliferator-activated receptor delta                             |
| P35980      | K        | I | L | T | F | D | Q | L |   |    |       | 977.567  | 60S ribosomal protein L18                                                    |
| P40201      | R        | V | L | I | F | S | Q | M |   |    |       | 993.556  | Chromodomain helicase DNA binding protein 1                                  |
| P41438      | S        | S | Y | I | F | S | L | V |   |    |       | 915.483  | Folate transporter 1                                                         |
| P42227      | A        | T | L | V | F | H | N | L |   |    |       | 914.51   | Signal transducer and activator of transcription 3                           |
| P47753      | I        | S | F | K | F | D | H | L |   |    |       | 1006.536 | F-actin-capping protein subunit alpha-1                                      |
| P53798      | I        | S | L | E | F | R | N | L |   |    |       | 991.558  | Squalene synthetase                                                          |
| P54823      | I        | N | F | D | F | P | K | L |   |    |       | 993.541  | Probable ATP-dependent RNA helicase DDX6                                     |
| P55194      | V        | S | G | I | F | P | G | L |   |    |       | 789.451  | SH3 domain-binding protein 1                                                 |
| P56528      | A        | N | Y | E | F | S | Q | V |   |    |       | 957.432  | ADP-ribosyl cyclase 1                                                        |
| P61600      | V        | A | P | E | F | R | R | L |   |    |       | 987.574  | N-acetyltransferase 5                                                        |
| P62082      | V        | N | F | E | F | P | E | V |   |    |       | 1028.473 | 40S ribosomal protein S7                                                     |
| P62245      | V        | I | V | R | F | L | T | V |   |    |       | 946.609  | 40S ribosomal protein S15a                                                   |
| P63082      | S        | A | M | V | F | S | A | M |   |    |       | 843.375  | Vacuolar ATP synthase 16 kDa proteolipid subunit                             |
| P63085      | V        | G | P | R | Y | T | N | L |   |    |       | 919.5    | Mitogen-activated protein kinase 1                                           |
| P68369      | T        | S | L | L | M | E | R | I |   |    |       | 962.534  | Tubulin alpha-1A chain                                                       |
| P68369      | S        | I | Y | P | A | P | Q | L |   |    |       | 874.467  | Tubulin alpha-1A chain                                                       |
| P68369      | E        | R | P | T | Y | T | N | L |   |    |       | 993.5    | Tubulin alpha 1A chain                                                       |
| P69566      | T        | Q | Q | L | Y | P | S | L |   |    |       | 949.5    | Ran binding protein 9                                                        |
| P97377      | K        | S | Y | L | F | Q | L | L |   |    |       | 1011.588 | Cell division protein kinase 2                                               |
| P97481      | S        | N | Y | L | F | T | K | L |   |    |       | 985.536  | Endothelial PAS domain-containing protein 1                                  |
| Q01237      | S        | S | F | V | F | S | T | V |   |    |       | 873.436  | 3-hydroxy-3-methylglutaryl-coenzyme A reductase                              |
| Q02248      | R        | T | Y | T | Y | E | K | L |   |    |       | 1073.567 | Catenin beta-1                                                               |
| Q02257      | R        | N | Y | S | Y | E | K | L |   |    |       | 1072.543 | Junction plakoglobin                                                         |
| Q09014      | E        | I | Y | E | F | H | K | M |   |    |       | 1096.514 | Neutrophil cytosol factor 1                                                  |
| Q3TAA7      | S        | A | L | R | F | L | N | L |   |    |       | 933.552  | Serine/threonine kinase 11-interacting protein                               |
| Q3THF9      | I        | S | F | E | F | R | S | L |   |    |       | 998.531  | Protein COQ10 B, mitochondrial precursor                                     |

|        |                     |          |                                                                                   |
|--------|---------------------|----------|-----------------------------------------------------------------------------------|
| Q3TJZ6 | A S P E F T K L     | 892.478  | Protein FAM98A                                                                    |
| Q3U507 | V I L I F H S V     | 927.567  | Probable G-protein coupled receptor 174                                           |
| Q3UD82 | S T F T F F Y V     | 965.462  | Poly [ADP-ribose] polymerase 8                                                    |
| Q3UWM4 | S N P E F F R Q L   | 990.501  | JmjC domain-containing histone demethylation protein 1D                           |
| Q4QQM1 | I L S L D Y N L L   | 950.52   | Cytosolic phospholipase A2 beta                                                   |
| Q4VAE7 | S S P K F S E L L   | 894.457  | Cytoskeleton associated protein 5                                                 |
| Q52KE7 | V I N V F H H L L   | 978.553  | Cyclin L1                                                                         |
| Q5H8C4 | V S I Q F Y H L L   | 1006.536 | Vacuolar protein sorting-associated protein 13A                                   |
| Q5SWD9 | R A Y L F A H V M   | 976.537  | Pre-rRNA-processing protein TSR1 homolog                                          |
| Q5SYH2 | S Q Y V F T E M M   | 1004.44  | Transmembrane protein 199                                                         |
| Q60775 | L V Y Q F K E M M   | 1057.539 | ETS-related transcription factor Elf-1                                            |
| Q60805 | T G P K Y I H L L   | 928.526  | Proto oncogene tyrosine protein kinase MER precursor                              |
| Q61107 | S T F V Y N S M M   | 948.414  | Guanylate binding protein 4                                                       |
| Q61471 | I S Y L Y N K L L   | 1013.567 | Protein Tob1 - Mus musculus                                                       |
| Q61545 | S N Y S Y P Q V V   | 957.432  | RNA-binding protein EWS                                                           |
| Q61584 | E I V T F E R L L   | 1006.557 | Fragile X mental retardation syndrome-related protein 1                           |
| Q62141 | V F T E V A N L L   | 892.478  | Paired amphipathic helix protein Sin3b                                            |
| Q62187 | V A L K F S Q I L   | 905.546  | Transcription termination factor 1                                                |
| Q62425 | V N V D Y S K L L   | 937.5    | NADH dehydrogenase [ubiquinone] 1 alpha subcomplex subunit 4                      |
| Q63844 | V G P R Y T Q L L   | 933.516  | Mitogen-activated protein kinase 3                                                |
| Q64310 | S S F V F L N L L   | 926.499  | Surfeit locus protein 4                                                           |
| Q64343 | V N I E F K D L L   | 977.531  | ATP-binding cassette sub-family G member 1                                        |
| Q64475 | S V Y V Y K V L L   | 970.561  | Histone H2B type 1-B                                                              |
| Q64475 | V N D I F E R I L   | 1005.537 | Histone H2B type 1-B                                                              |
| Q68925 | T A P E Y V F L L   | 939.483  | Protein strawberry notch homolog 1                                                |
| Q6GQT6 | S G Y D F S R L L   | 944.448  | Sterol regulatory element-binding protein cleavage-activating protein             |
| Q6NSR3 | S G P T Y I K L L   | 878.499  | Uncharacterized aarF domain-containing protein kinase 2                           |
| Q6P5F9 | L I Y K F L N V V   | 1009.609 | Exportin-1                                                                        |
| Q6PCN7 | S G F V F T R L L   | 926.51   | Helicase-like transcription factor                                                |
| Q6PJN8 | T A P Q Y Y R L L   | 1011.526 | DALR anticodon-binding domain-containing protein 3                                |
| Q6WKZ8 | V A Y K F P E L L   | 966.53   | E3 ubiquitin-protein ligase UBR2                                                  |
| Q6ZPE2 | V A L L F R R Q L L | 959.604  | Myotubularin-related protein 5                                                    |
| Q71B07 | S V V A F H N L L   | 886.479  | Protein dpy-19 homolog 3                                                          |
| Q76M23 | V A D K F T E L L   | 922.489  | Serine/threonine-protein phosphatase 2A 65 kDa regulatory subunit A alpha isoform |
| Q791N7 | T S V V F N K L L   | 907.525  | DNA-directed RNA polymerase I subunit RPA12                                       |
| Q7M6Y3 | V A F D F T K V V   | 926.499  | Phosphatidylinositol-binding clathrin assembly protein                            |
| Q7TN60 | A S Y L F R G L L   | 926.51   | Transmembrane channel-like protein 6                                              |
| Q7TNB8 | S A P E Y V F L L   | 925.467  | Protein strawberry notch homolog 2                                                |
| Q7TNP2 | I V P L F T N L L   | 916.551  | Serine/threonine-protein phosphatase 2A 65 kDa regulatory subunit A beta isoform  |
| Q80VD1 | S S P E F S E L L   | 895.405  | Protein FAM98B                                                                    |
| Q80YV3 | I R T L Y L T L L   | 992.614  | Transformation/transcription domain-associated protein                            |
| Q80ZV0 | S S L L F V K L L   | 906.566  | Ribonuclease H2 subunit B                                                         |
| Q8BVF2 | K I I T Y R N L L   | 1020.621 | PCI domain-containing protein 2                                                   |
| Q8BHB0 | Q S Y E F F H L L   | 1070.495 | Nucleotide-binding oligomerization domain-containing protein 1                    |
| Q8BHC4 | V I Q V F Q Q L L   | 974.568  | Dephospho-CoA kinase domain-containing protein                                    |
| Q8BJW5 | I A V S F R Q L L   | 934.536  | Nucleolar protein 11                                                              |
| Q8BLR9 | T N L V Y P A L L   | 890.499  | Hypoxia-inducible factor 1 alpha inhibitor                                        |
| Q8BM10 | S A F S F R T L L   | 928.489  | F box only protein 3b                                                             |
| Q8BRG6 | I W I R V A S L L   | 957.589  | Keich-like protein 24                                                             |
| Q8BU03 | I F A Y R F S N L L | 1017.516 | Periodic tryptophan protein 2 homolog                                             |
| Q8BXB6 | L G C L T I P L L   | 829.486  | Solute carrier organic anion transporter family member 2B1                        |
| Q8C008 | I V T K F F Q V V   | 933.577  | Ankyrin repeat-containing protein C20orf12 homolog                                |
| Q8CSN3 | A S P I F T H V L   | 871.468  | Nucampolin homolog                                                                |
| Q8CD15 | V V Y I Y H S L L   | 993.541  | Myc induced nuclear antigen                                                       |
| Q8CDD8 | I N F D F N T I L   | 983.484  | BTB/POZ domain-containing protein KCTD20                                          |
| Q8CFA1 | V A F A F K K L L   | 923.572  | Interleukin-1 receptor-associated kinase-like 2                                   |
| Q8CFB4 | S T F V F N T M M   | 962.429  | Guanylate-binding protein 5                                                       |
| Q8CG47 | A A L D F K N V V   | 877.478  | Structural maintenance of chromosomes protein 4                                   |
| Q8CH77 | S N I Q Y R S L L   | 980.516  | Neuron navigator 1                                                                |
| Q8CHY3 | F N S L Y T A L L   | 928.478  | Dymeclin                                                                          |
| Q8CIK8 | N N Y V Y A G L L   | 913.442  | RING finger and WD repeat domain-containing protein 3                             |
| Q8CIL4 | F N L E K A R L L   | 990.574  | Uncharacterized protein C1orf131 homolog                                          |
| Q8K015 | E A Y R F T G L L   | 956.484  | Centromere protein O                                                              |
| Q8K0S9 | A A F V F R K L L   | 951.578  | snRNA-activating protein complex subunit 1                                        |
| Q8K2K6 | R G P T Y V N M M   | 937.457  | Nucleoporin like protein RIP                                                      |
| Q8K2V6 | T I I L F T K V V   | 934.598  | Importin-11                                                                       |
| Q8K2X8 | V I A E L V N V V   | 856.514  | TFIIH basal transcription factor complex TTD-A subunit                            |
| Q8K310 | K N L R Y Q L L L   | 1047.632 | Matrin-3                                                                          |
| Q8K3W0 | A T Q V Y P K L L   | 919.525  | Protein BRE                                                                       |
| Q8K4Z5 | R N Y Q F D F L L   | 1102.532 | Splicing factor 3 subunit 1                                                       |
| Q8QZK2 | T S Y R F L A L L   | 970.536  | Uncharacterized protein C4orf15 homolog                                           |
| Q8R0P8 | A A Y T F Y A L L   | 919.457  | Abhydrolase domain-containing protein 8                                           |
| Q8R1F1 | A V Y T F E T L L   | 943.478  | Niban-like protein                                                                |
| Q8R4V1 | F N L V Y E N L L   | 1011.515 | NFAT activation molecule 1 precursor                                              |
| Q8R502 | E I V S F Q H L L   | 972.515  | Leucine-rich repeat-containing protein 8C                                         |
| Q8VCP8 | S G L K Y V N V V   | 879.494  | Adenylylase kinase isoenzyme 6                                                    |
| Q91V92 | S I A N F T N V V   | 865.442  | ATP-citrate synthase                                                              |
| Q91XB7 | S G Y K Y V G M M   | 904.424  | Protein YIF1A                                                                     |
| Q91YR7 | V W L E A A R L L   | 957.552  | Pre-mRNA-processing factor 6                                                      |
| Q91ZE5 | S V I T Y V G L L   | 851.488  | EGF-like module-containing mucin-like hormone receptor-like 4 precursor           |
| Q91ZX7 | L S H P F S I D L   | 915.458  | Prolow density lipoprotein receptor related protein 1 precursor                   |
| Q920Q4 | V S F T Y R Y L L   | 1048.547 | Vacuolar protein sorting-associated protein 16 homolog                            |
| Q99KC8 | A V Y S F E A L L   | 899.452  | Loss of heterozygosity 11 chromosomal region 2 gene A protein homolog             |
| Q99KH8 | I S P L F A E L L   | 889.504  | Serine/threonine-protein kinase 24                                                |
| Q99KP6 | R S L K F Y S L L   | 1013.578 | Pre-mRNA-processing factor 19                                                     |
| Q99P81 | S S Y F F G K L L   | 948.483  | ATP-binding cassette sub-family G member 3                                        |
| Q99PQ1 | I S Y Q F S N L L   | 971.484  | Tripertite motif-containing protein 12                                            |
| Q9CPV7 | S V I K F E N L L   | 949.536  | Probable palmitoyltransferase ZDHHC6                                              |
| Q9CQV4 | T S L R F V F L L   | 982.573  | Protein FAM134C                                                                   |
| Q9CR47 | S S P L Y T T L L   | 881.462  | TGF-beta-inducible nuclear protein 1                                              |
| Q9CR64 | A I F N F Q T L L   | 939.494  | Transmembrane protein 167 precursor                                               |
| Q9CXF4 | T N Y I F D S L L   | 972.468  | TBC1 domain family member 15                                                      |
| Q9CZM2 | S T Y K F F E V L   | 1020.504 | 60S ribosomal protein L15                                                         |
| Q9D306 | V T L E F S K L L   | 936.541  | Alpha-1,3-mannosyl-glycoprotein 4-beta-N-acetylglucosaminyltransferase C          |
| Q9D6T0 | T S V R F T Q L L   | 951.526  | Nitric oxide synthase-interacting protein                                         |
| Q9D6Z1 | Y G Y H F P E L L   | 1025.473 | Nucleolar protein 5A                                                              |
| Q9D7G0 | V S Y L F S H V V   | 951.494  | Ribose-phosphate pyrophosphokinase 1                                              |
| Q9D8E6 | V N F V H T N L L   | 943.5    | 60S ribosomal protein L4                                                          |
| Q9D8N6 | S T L I Y R N M M   | 997.514  | Protein lin-37 homolog                                                            |
| Q9D902 | S G Y K F G V L L   | 870.472  | Transcription initiation factor IIE subunit beta                                  |
| Q9DBT5 | V G Y R Y E T L L   | 1000.51  | AMP deaminase 2                                                                   |
| Q9DBZ5 | V G I T Y Q H I L   | 930.505  | Eukaryotic translation initiation factor 3 subunit K                              |
| Q9DCF9 | V A F A Y K N V V   | 911.499  | Translocon-associated protein subunit gamma                                       |
| Q9EPU0 | S G Y I Y H K L L   | 980.52   | Regulator of nonsense transcripts 1                                               |
| Q9EQ06 | T A Y E F A K L L   | 942.494  | Estradiol 17-beta-dehydrogenase 11 precursor                                      |
| Q9ERU9 | S T F T F A D L L   | 901.431  | E3 SUMO-protein ligase RanBP2                                                     |
| Q9EST5 | V F R L L P Q L L   | 985.62   | Acidic leucine-rich nuclear phosphoprotein 32 family member B                     |
| Q9JHD2 | V Q Y K F S H L L   | 1021.547 | General control of amino acid synthesis protein 5-like 2                          |

|        |                 |          |                                                             |
|--------|-----------------|----------|-------------------------------------------------------------|
| Q9JHF7 | I R Y I F A Y L | 1058.604 | Glutathione-requiring prostaglandin D synthase              |
| Q9JH7  | Q T Y D Y R N I | 1072.506 | Exosome complex exonuclease RRP45                           |
| Q9JHJ3 | S A L V F T R L | 906.541  | Uncharacterized protein C1orf85 homolog precursor           |
| Q9JHJ5 | I V F K T N V L | 933.577  | 5-hydroxytryptamine receptor 3B precursor                   |
| Q9JH78 | I I I T F N D L | 948.541  | Peptide-N (4)-(N-acetyl-beta-glucosaminy)asparagine amidase |
| Q9JIF7 | I A L R Y V A L | 918.578  | Coatomer subunit beta                                       |
| Q9JJU8 | A V Y A F L G L | 853.482  | SH3 domain-binding glutamic acid-rich-like protein          |
| Q9JL26 | L Q Y E F T H L | 1050.526 | Formin-like protein 1                                       |
| Q9JLJ1 | V V F F F K T L | 1000.587 | Selenoprotein K                                             |
| Q9QUG9 | V G F R F P I L | 948.567  | RAS guanyl-releasing protein 2                              |
| Q9QXB9 | A S Y E F T T L | 931.441  | Developmentally-regulated GTP-binding protein 2             |
| Q9QXK3 | A T Y I F N G L | 898.467  | Coatomer subunit gamma-2                                    |
| Q9QZ88 | V T Y V Y Q L I | 998.556  | Vacuolar protein sorting-associated protein 29              |
| Q9QZ19 | Y S Y S F F H L | 1063.489 | Serine incorporator 3                                       |
| Q9R190 | S I V Q F Y Y M | 1050.497 | Metastasis-associated protein MTA2                          |
| Q9R1T2 | H G Y T F A N L | 922.442  | SUMO activating enzyme subunit 1                            |
| Q9WUK4 | A V L R Y T K L | 963.599  | Replication factor C subunit 2                              |
| Q9WUR2 | S S Y T F P K M | 960.45   | Peroxisomal 3,2 trans enoyl CoA isomerase                   |
| Q9WVC6 | S T L T Y S R M | 958.467  | Serine/threonine protein kinase Sgk1                        |
| Q9Z0S9 | S N Y V F V F L | 988.514  | Prenylated Rab acceptor protein 1                           |
| Q9Z1N2 | P H R A T P Q I | 919.511  | Origin recognition complex subunit 1                        |
| Q9Z2C4 | S A F E F N E L | 956.437  | Myotubularin-related protein 1                              |
| Q9Z2R6 | G T V L F E I K | 906.53   | Protein unc-119 homolog                                     |
| Q9Z2R9 | S S I V F A E L | 865.467  | Eukaryotic translation initiation factor 2-alpha kinase 1   |

161 K<sup>b</sup> peptides (ERAAP-deficient spleen cells)

| Accession # | Peptides |   |   |   |   |   |   |   |   |    | Bulge    | m/z                                                                               | Protein entry name                                              |                                                                              |
|-------------|----------|---|---|---|---|---|---|---|---|----|----------|-----------------------------------------------------------------------------------|-----------------------------------------------------------------|------------------------------------------------------------------------------|
|             | 1        | 2 | 3 | 4 | 5 | 6 | 7 | 8 | 9 | 10 |          |                                                                                   |                                                                 |                                                                              |
| P59672      | S        | F | L | S | G | Y | S | S | I |    | N-       | X                                                                                 | 1047.5                                                          | Ankyrin repeat and SAM domain-containing protein 1A                          |
| Q8CIR4      | V        | A | I | G | L | F | A | V | G | F  | X        | X                                                                                 | 993.577                                                         | Transient receptor potential cation channel subfamily M member 6             |
| P14434      | V        | N | R | D | Y | S | F | H | K | L  | X        | X                                                                                 | 1278.66                                                         | H 2 class II histocompatibility antigen, A B alpha chain precursor           |
| Q9Z127      | V        | A | V | D | F | G | N | Y | H | L  | X        | X                                                                                 | 1134.558                                                        | Large neutral amino acids transporter small subunit 1                        |
| P28867      | K        | N | H | E | F | I | A | T | F |    | X        | X                                                                                 | 1106.564                                                        | Protein kinase C delta type                                                  |
| Q64430      | S        | T | L | Q | Y | V | S | S | I |    | X        | X                                                                                 | 997.521                                                         | Copper-transporting ATPase 1                                                 |
| Q8R420      | V        | D | L | T | F | P | G | S | I |    | X        | X                                                                                 | 948.479                                                         | ATP-binding cassette sub-family A member 3                                   |
| Q9D267      | V        | E | T | D | Y | S | M | Y | I |    | X        | X                                                                                 | 1134.499                                                        | Epididymal-specific lipocalin-9 precursor                                    |
| Q91V92      | V        | L | A | S | F | I | S | G | L |    | X        | X                                                                                 | 906.53                                                          | ATP-citrate synthase                                                         |
| P05132      | V        | N | F | P | F | L | V | K | L |    | X        | X                                                                                 | 1076.651                                                        | cAMP-dependent protein kinase, alpha-catalytic subunit                       |
| Q9R0N0      | A        | T | Y | T | F | I | Q | Q | L |    | X        | X                                                                                 | 1084.568                                                        | Galactokinase                                                                |
| P60710      | V        | A | L | D | F | E | Q | E | M |    | X        | X                                                                                 | 1081.488                                                        | Actin, cytoplasmic 1                                                         |
| Q6P5F9      | T        | I | L | E | F | S | Q | N | M |    | X        | X                                                                                 | 1082.519                                                        | Exportin 1                                                                   |
| Q99KU6      | E        | L | F | P | V | F | T | Q | L |    | X        | X                                                                                 | 1093.593                                                        | Uncharacterized protein C6orf89 homolog                                      |
| O35643      | S        | T | L | Y | P | L | H | V | L | F  |          |                                                                                   | 1189.662                                                        | AP-1 complex subunit beta-1                                                  |
| Q8BG48      | S        | I | Y | P | L | G | D | I | K | I  |          |                                                                                   | 1118.646                                                        | Serine/threonine-protein kinase 17B                                          |
| Q8BXJ2      | L        | P | L | D | Q | L | S | L | M | K  |          |                                                                                   | 1157.642                                                        | Transcriptional-regulating factor 1                                          |
| Q9JUX7      | T        | V | I | F | A | G | D | T | N | L  |          |                                                                                   | 1050.547                                                        | TRAF and TNF receptor-associated protein                                     |
| P11610      | P        | S | S | A | H | G | H | Q | L | L  |          |                                                                                   | 1046.527                                                        | T-cell surface glycoprotein CD1d2 precursor                                  |
| Q99KU6      | R        | E | L | F | P | V | F | T | Q | L  |          |                                                                                   | 1249.695                                                        | Uncharacterized protein C6orf89 homolog                                      |
| Q5DTZ0      | L        | E | V | T | V | S | Q | V | S | L  |          |                                                                                   | 1074.605                                                        | Integrase catalytic domain-containing protein KIAA1305                       |
| Q9JHW4      | F        | V | V | P | L | P | Q | A | E | P  |          |                                                                                   | 1025.567                                                        | Selenocysteine-specific elongation factor                                    |
| P01887      | I        | Q | K | T | P | Q | I | Q | V | Y  |          |                                                                                   | 1217.689                                                        | Beta-2-microglobulin precursor                                               |
| P59644      | S        | V | G | Q | L | V | V | S | A |    |          |                                                                                   | 859.489                                                         | Phosphatidylinositol 4,5-bisphosphate 5-phosphatase A                        |
| Q8VCF1      | L        | A | E | K | G | R | G | M | E |    |          |                                                                                   | 990.504                                                         | Soluble calcium-activated nucleotidase 1                                     |
| Q8BYK6      | G        | V | F | S | Q | P | G | A | L |    |          |                                                                                   | 875.463                                                         | YTH domain family protein 3                                                  |
| P14685      | R        | V | Y | E | F | L | D | K | L |    |          |                                                                                   | 1182.677                                                        | 26S proteasome non-ATPase regulatory subunit 3                               |
| Q99ME9      | Q        | I | L | S | D | F | P | K | L |    |          |                                                                                   | 1060.604                                                        | Nucleolar GTP-binding protein 1                                              |
| Q6PGC7      | I        | A | A | G | L | L | F | N | L |    |          |                                                                                   | 931.562                                                         | Solute carrier family 35 member E3                                           |
| Q9D1G0      | Y        | G | F | V | S | K | P | L |   |    |          |                                                                                   | 997.536                                                         | Deoxyribonuclease I-like 2 precursor                                         |
| P04441      | S        | G | P | L | E | Y | P | Q | L |    |          |                                                                                   | 1003.51                                                         | H-2 class II histocompatibility antigen gamma chain                          |
| P68433      | T        | I | M | P | K | D | I | Q | L |    |          |                                                                                   | 1058.592                                                        | Histone H3.1                                                                 |
| P46978      | A        | V | L | S | F | S | T | R | L |    |          |                                                                                   | 993.573                                                         | Dolichyl-diphosphooligosaccharide--protein glycosyltransferase subunit STT3A |
| Q8R3L2      | R        | N | Y | E | Y | L | I | R | L |    |          |                                                                                   | 1239.685                                                        | Transcription factor 25                                                      |
| Q9CR67      | Q        | S | I | A | F | I | S | R | L |    |          |                                                                                   | 1034.6                                                          | Transmembrane protein 33                                                     |
| Q9JHU4      | A        | S | Y | E | F | V | Q | R | L |    |          |                                                                                   | 1112.574                                                        | Dynein heavy chain 1, cytoplasmic 1                                          |
| Q5SNZ0      | Q        | L | E | K | T | I | E | T | L |    |          |                                                                                   | 1074.605                                                        | Girdin                                                                       |
| Q8BW96      | K        | I | F | E | F | K | E | T | L |    |          |                                                                                   | 1154.646                                                        | Calcium/calmodulin-dependent protein kinase type 1D                          |
| Q9Z1E3      | A        | I | V | E | H | L | V | T | L |    |          |                                                                                   | 994.594                                                         | NF-kappa-B inhibitor alpha                                                   |
| Q8CGZ0      | K        | S | Y | S | F | I | A | R | M |    |          |                                                                                   | 1102.572                                                        | Calcium homeostasis endoplasmic reticulum protein                            |
| P14142      | I        | S | A | A | F | R | R | T | P |    |          |                                                                                   | 1018.58                                                         | Solute carrier family 2, facilitated glucose transporter member 4            |
| Q8C0F9      | L        | V | Y | R | F | C | S | V | S |    |          |                                                                                   | 1073.545                                                        | Inactive serine protease 35 precursor                                        |
| Q8CIZ8      | V        | L | Q | Y | S | Y | T | V | T |    |          |                                                                                   | 1073.552                                                        | von Willebrand factor precursor                                              |
| Q8K2H4      | I        | N | Q | I | Y | E | A | R | V |    |          |                                                                                   | 1105.601                                                        | Centaurin-beta-1                                                             |
| Q6ZVW3      | T        | V | F | S | H | A | Q | T | V |    |          |                                                                                   | 989.506                                                         | 40S ribosomal protein S27-like protein                                       |
| Q912X7      | L        | S | H | P | F | S | I | D |   |    |          | 915.458                                                                           | Prolow density lipoprotein receptor related protein 1 precursor |                                                                              |
| P62082      | V        | N | F | E | F | P | E | F |   |    |          | 1028.473                                                                          | 40S ribosomal protein S7                                        |                                                                              |
| Q9EQQ9      | S        | S | A | Q | F | L | I | G |   |    |          | 822.436                                                                           | Bifunctional protein NCOAT                                      |                                                                              |
| O70481      | S        | T | F | E | F | H | S | I |   |    |          | 967.452                                                                           | E3 ubiquitin protein ligase UBR1                                |                                                                              |
| O88427      | S        | N | Y | I | F | T | A | I |   |    |          | 928.478                                                                           | Voltage-dependent T-type calcium channel subunit alpha-1H       |                                                                              |
| P22366      | S        | I | L | R | F | I | T | I |   |    |          | 962.604                                                                           | Myeloid differentiation primary response protein MyD88          |                                                                              |
| Q64475      | V        | N | D | I | F | E | R | I |   |    |          | 1005.537                                                                          | Histone H2B type 1-B                                            |                                                                              |
| Q75UR0      | L        | N | F | F | Y | E | K | I |   |    |          | 1073.567                                                                          | Transmembrane protein 16E                                       |                                                                              |
| Q8CDD8      | I        | N | F | D | F | N | T | I |   |    |          | 983.484                                                                           | BTB/POZ domain-containing protein KCTD20                        |                                                                              |
| Q9CY50      | A        | T | F | E | Y | S | F | I |   |    |          | 977.462                                                                           | Translocon-associated protein subunit alpha precursor           |                                                                              |
| Q9DBZ5      | V        | G | I | T | Y | Q | H | I |   |    |          | 930.505                                                                           | Eukaryotic translation initiation factor 3 subunit K            |                                                                              |
| O70126      | Y        | P | W | P | Y | G | S | K |   |    |          | 997.478                                                                           | Serine/threonine-protein kinase 12                              |                                                                              |
| P70699      | T        | S | P | T | F | F | P | K |   |    |          | 924.483                                                                           | Lysosomal alpha glucosidase precursor                           |                                                                              |
| A2APV2      | L        | Q | Y | E | F | T | K | L |   |    |          | 1041.562                                                                          | Formin-like protein 2                                           |                                                                              |
| A2RSY6      | R        | S | F | D | F | I | H | L |   |    |          | 1034.542                                                                          | TRM1-like protein                                               |                                                                              |
| O08575      | T        | I | I | I | F | H | S | L |   |    |          | 943.562                                                                           | Eyes absent homolog 2                                           |                                                                              |
| O54692      | S        | T | V | E | F | T | N | L |   |    |          | 910.452                                                                           | Centromere/kinetochore protein zw10 homolog                     |                                                                              |
| O55013      | S        | A | L | I | Y | S | N | L |   |    |          | 880.478                                                                           | Trafficking protein particle complex subunit 3                  |                                                                              |
| P01867      | S        | V | H | T | F | P | A | L |   |    |          | 871.468                                                                           | Ig gamma-2B chain C region, membrane-bound form                 |                                                                              |
| P15307      | T        | T | L | I | F | Q | K | L |   |    |          | 963.588                                                                           | C-Rel proto-oncogene protein                                    |                                                                              |
| P18760      | I        | S | L | E | G | K | P | L |   |    |          | 856.514                                                                           | Cofilin-1 - Mus musculus (Mouse) [MASS=18559]                   |                                                                              |
| P23116      | Q        | S | I | E | F | S | R | L |   |    |          | 979.521                                                                           | Eukaryotic translation initiation factor 3 subunit A            |                                                                              |
| P23475      | V        | S | P | Y | F | V | A | L |   |    |          | 895.493                                                                           | ATP-dependent DNA helicase 2 subunit 1                          |                                                                              |
| P32233      | A        | A | Y | E | F | T | L |   |   |    | 915.446  | Developmentally-regulated GTP-binding protein 1                                   |                                                                 |                                                                              |
| P33215      | Y        | S | L | F | R | K | S | L |   |    |          | 1013.578                                                                          | Protein NEDD1                                                   |                                                                              |
| P42227      | A        | T | L | V | F | H | N | L |   |    |          | 914.51                                                                            | Signal transducer and activator of transcription 3              |                                                                              |
| P47753      | I        | S | F | K | F | D | H | L |   |    |          | 1006.536                                                                          | F-actin-capping protein subunit alpha-1                         |                                                                              |
| P54823      | I        | N | F | D | F | P | K | L |   |    |          | 993.541                                                                           | Probable ATP-dependent RNA helicase DDX6                        |                                                                              |
| P55194      | V        | S | G | I | F | P | G | L |   |    |          | 789.451                                                                           | SH3 domain-binding protein 1                                    |                                                                              |
| P58749      | V        | T | Y | I | F | N | H | L |   |    |          | 1006.536                                                                          | Transmembrane 6 superfamily member 1                            |                                                                              |
| P97377      | K        | S | Y | L | F | Q | L | L |   |    |          | 1011.588                                                                          | Cell division protein kinase 2                                  |                                                                              |
| P97481      | S        | N | Y | L | F | T | K | L |   |    |          | 985.536                                                                           | Endothelial PAS domain-containing protein 1                     |                                                                              |
| P99027      | A        | S | Y | L | L | A | A | L |   |    |          | 821.477                                                                           | 60S acidic ribosomal protein P2                                 |                                                                              |
| Q02248      | R        | T | Y | T | Y | E | K | L |   |    |          | 1073.567                                                                          | Catenin beta-1                                                  |                                                                              |
| Q02257      | R        | N | Y | S | Y | E | K | L |   |    |          | 1072.543                                                                          | Junction plakoglobin                                            |                                                                              |
| Q3TAA7      | S        | A | L | R | F | L | N | L |   |    |          | 933.552                                                                           | Serine/threonine kinase 11-interacting protein                  |                                                                              |
| Q3THF9      | I        | S | F | E | F | R | S | L |   |    |          | 998.531                                                                           | Protein COQ10 B, mitochondrial precursor                        |                                                                              |
| Q61471      | I        | S | Y | L | Y | N | K | L |   |    |          | 1013.567                                                                          | Protein Tob1                                                    |                                                                              |
| Q62351      | K        | A | F | T | Y | I | N | L |   |    |          | 969.541                                                                           | Transferrin receptor protein 1                                  |                                                                              |
| Q62425      | V        | N | V | D | Y | S | K | L |   |    |          | 937.5                                                                             | NADH dehydrogenase [ubiquinone] 1 alpha subcomplex subunit 4    |                                                                              |
| Q64310      | S        | S | F | V | F | L | N | L |   |    |          | 926.499                                                                           | Surfeit locus protein 4                                         |                                                                              |
| Q64343      | V        | N | I | E | F | K | D | L |   |    |          | 977.531                                                                           | ATP-binding cassette sub-family G member 1                      |                                                                              |
| Q64475      | S        | V | Y | V | Y | K | V | L |   |    |          | 970.561                                                                           | Histone H2B type 1-B                                            |                                                                              |
| Q64693      | S        | G | P | Q | V | F | V | Q | L |    |          | 875.463                                                                           | POU domain class 2-associating factor 1                         |                                                                              |
| Q68925      | T        | A | P | E | Y | V | F | L |   |    | 939.483  | Protein strawberry notch homolog 1                                                |                                                                 |                                                                              |
| Q6PCN7      | S        | G | F | V | F | T | R | L |   |    | 926.51   | Helicase-like transcription factor                                                |                                                                 |                                                                              |
| Q6PJN8      | T        | A | P | Q | Y | Y | R | L |   |    | 1011.526 | DALR anticodon-binding domain-containing protein 3                                |                                                                 |                                                                              |
| Q6WKZ8      | V        | A | Y | K | F | P | E | L |   |    | 966.53   | E3 ubiquitin-protein ligase UBR2                                                  |                                                                 |                                                                              |
| Q6ZPE2      | V        | A | L | L | F | R | Q | L |   |    | 959.604  | Myotubularin-related protein 5                                                    |                                                                 |                                                                              |
| Q71B07      | S        | V | V | A | F | H | N | L |   |    | 886.479  | Protein dpy-19 homolog 3                                                          |                                                                 |                                                                              |
| Q76M23      | V        | A | D | K | F | T | E | L |   |    | 922.489  | Serine/threonine-protein phosphatase 2A 65 kDa regulatory subunit A alpha isoform |                                                                 |                                                                              |
| Q7TMY7      | Q        | N | H | V | F | P | L | L |   |    | 967.537  | Importin-8                                                                        |                                                                 |                                                                              |
| Q7TNB8      | S        | A | P | E | Y | V | F | L |   |    | 925.467  | Protein strawberry notch homolog 2                                                |                                                                 |                                                                              |
| Q80TY5      | M        | S | F | Q | F | A | H | L |   |    | 980.466  | Vacuolar protein sorting associated protein 13B                                   |                                                                 |                                                                              |
| Q80W47      | S        | G | Y | K | F | F | S | L |   |    | 948.483  | WD repeat domain phosphoinositide-interacting protein 2                           |                                                                 |                                                                              |
| Q80ZV0      | S        | S | L | L | F | V | K | L |   |    | 906.566  | Ribonuclease H2 subunit B                                                         |                                                                 |                                                                              |

|         |   |   |   |   |   |   |   |   |          |                                                                         |
|---------|---|---|---|---|---|---|---|---|----------|-------------------------------------------------------------------------|
| Q8BH0   | Q | S | Y | E | F | F | H | L | 1070.495 | Nucleotide-binding oligomerization domain-containing protein 1          |
| Q8BH4   | V | I | Q | V | F | Q | Q | L | 974.568  | Dephospho-CoA kinase domain-containing protein                          |
| Q8BJ4   | S | F | A | P | V | T | K | L | 862.504  | Limkain-b1                                                              |
| Q8CF6   | T | I | L | S | F | T | N | L | 908.509  | Sodium-coupled neutral amino acid transporter 2                         |
| Q8CH7   | N | L | F | V | F | K | E | L | 1009.572 | Rap guanine nucleotide exchange factor 2                                |
| Q8CHR8  | A | A | Y | E | F | T | T | L | 915.446  | Developmentally regulated GTP binding protein 1                         |
| Q8K02   | S | V | Y | T | H | S | Y | L | 969.468  | Ectonucleoside triphosphate diphosphohydrolase 8                        |
| Q8K3W0  | A | T | Q | V | Y | P | K | L | 919.525  | Protein BRE                                                             |
| Q8K4Z5  | R | N | Y | Q | F | D | F | L | 1102.532 | Splicing factor 3 subunit 1                                             |
| Q8R0P8  | A | A | Y | T | F | Y | A | L | 919.457  | Abhydrolase domain-containing protein 8                                 |
| Q8VCC8  | L | L | R | K | F | I | K | L | 1030.714 | Rap guanine nucleotide exchange factor 3                                |
| Q91ZE5  | S | V | I | T | Y | V | G | L | 851.488  | EGF-like module-containing mucin-like hormone receptor-like 4 precursor |
| Q920Q4  | V | S | F | T | Y | R | Y | L | 1048.547 | Vacuolar protein sorting-associated protein 16 homolog                  |
| Q924N4  | S | A | A | R | F | A | L | L | 848.499  | Solute carrier family 12 member 6                                       |
| Q99KC8  | A | V | Y | S | F | E | A | L | 899.452  | Loss of heterozygosity 11 chromosomal region 2 gene A protein homolog   |
| Q99LM9  | S | V | V | A | Y | N | N | L | 879.458  | Transcriptional adapter 1-like protein                                  |
| Q99P81  | S | S | Y | F | F | G | K | L | 948.483  | ATP-binding cassette sub-family G member 3                              |
| Q99PQ1  | I | S | Y | Q | F | S | N | L | 971.484  | Tripartite motif-containing protein 12                                  |
| Q9CPV7  | S | V | I | K | F | E | N | L | 949.536  | Probable palmitoyltransferase ZDHHC6                                    |
| Q9CXF4  | T | N | Y | I | F | D | S | L | 972.468  | TBC1 domain family member 15                                            |
| Q9CXV1  | S | A | L | T | F | A | G | L | 779.43   | Succinate dehydrogenase [ubiquinone] cytochrome b small subunit,        |
| Q9D6T0  | T | S | V | R | F | T | Q | L | 951.526  | Nitric oxide synthase-interacting protein                               |
| Q9D8E6  | V | N | F | V | H | T | N | L | 943.5    | 60S ribosomal protein L4                                                |
| Q9DA79  | V | L | R | S | F | Y | E | L | 1026.562 | Dipeptidase 3 precursor                                                 |
| Q9DBT5  | V | G | Y | R | Y | E | T | L | 1000.51  | AMP deaminase 2                                                         |
| Q9EPU0  | S | G | Y | I | Y | H | K | L | 980.52   | Regulator of nonsense transcripts 1                                     |
| Q9EQ6   | T | A | Y | E | F | A | K | L | 942.494  | Estradiol 17-beta-dehydrogenase 11 precursor                            |
| Q9EST5  | V | F | R | L | L | P | Q | L | 985.62   | Acidic leucine-rich nuclear phosphoprotein 32 family member B           |
| Q9JHD2  | V | Q | Y | K | F | S | H | L | 1021.547 | General control of amino acid synthesis protein 5-like 2                |
| Q9JHJ3  | S | A | L | V | F | T | R | L | 906.541  | Uncharacterized protein C1orf85 homolog precursor                       |
| Q9JL26  | L | Q | Y | E | F | T | H | L | 1050.526 | Formin-like protein 1                                                   |
| Q9JLJ1  | V | V | F | F | F | K | T | L | 1000.587 | Selenoprotein K                                                         |
| Q9QUG9  | V | G | F | R | F | P | I | L | 948.567  | RAS guanyl-releasing protein 2                                          |
| Q9QXB9  | A | S | Y | E | F | T | T | L | 931.441  | Developmentally-regulated GTP-binding protein 2                         |
| Q9R0H0  | T | A | Y | A | F | H | F | L | 969.483  | Acyl-coenzyme A oxidase 1, peroxisomal                                  |
| Q9R1T2  | H | G | Y | T | F | A | N | L | 922.442  | SUMO activating enzyme subunit 1                                        |
| Q9WVK4  | S | S | G | D | F | P | S | L | 809.368  | EH domain-containing protein 1                                          |
| Q9Z0M6  | L | S | Y | I | F | T | L | L | 969.566  | CD97 antigen precursor                                                  |
| Q9Z1K8  | A | L | A | L | Y | S | A | L | 821.477  | Y+L amino acid transporter 1                                            |
| Q9Z2C4  | S | A | F | E | F | N | E | L | 956.437  | Myotubularin-related protein 1                                          |
| O09159  | S | T | Y | S | V | A | K | M | 886.434  | Lysosomal alpha mannosidase precursor                                   |
| P40336  | R | S | Y | D | F | E | F | M | 1094.462 | Vacuolar protein sorting-associated protein 26A                         |
| Q91XB7  | S | G | Y | K | Y | V | G | M | 904.424  | Protein YIF1A                                                           |
| Q9WJUR2 | S | S | Y | T | F | P | K | M | 960.45   | Peroxisomal 3,2 trans enoyl CoA isomerase                               |
| Q9QWK5  | Q | S | I | E | F | R | L | S | 979.521  | Baculoviral IAP repeat containing protein 1a                            |
| Q9R144  | N | A | Y | E | F | N | L | S | 957.432  | Protein arginine N-methyltransferase 2                                  |
| P29351  | A | Q | Y | K | F | I | Y | V | 1031.557 | Tyrosine protein phosphatase non receptor type 6                        |
| P29351  | A | Q | Y | K | F | I | Y | V | 1031.557 | Tyrosine-protein phosphatase non-receptor type 6                        |
| P56528  | A | N | Y | E | F | S | Q | V | 957.432  | ADP-ribosyl cyclase 1                                                   |
| P62245  | V | I | V | R | F | L | T | V | 946.609  | 40S ribosomal protein S15a                                              |
| Q01237  | S | S | F | V | F | S | T | V | 873.436  | 3-hydroxy-3-methylglutaryl-coenzyme A reductase                         |
| Q3U507  | V | I | L | I | F | H | S | V | 927.567  | Probable G-protein coupled receptor 174                                 |
| Q6SW09  | R | A | Y | L | F | A | H | V | 976.537  | Pre-rRNA-processing protein TSR1 homolog                                |
| Q81545  | S | N | Y | S | Y | P | Q | V | 957.432  | RNA-binding protein EWS                                                 |
| Q8PF59  | L | I | Y | K | F | L | N | V | 1009.609 | Exportin-1                                                              |
| Q8CG47  | A | A | L | D | F | K | N | V | 877.478  | Structural maintenance of chromosomes protein 4                         |
| Q8K2X8  | V | I | A | E | L | V | N | V | 856.514  | TFIIH basal transcription factor complex TTD-A subunit                  |
| Q8VCP8  | S | G | L | K | Y | V | N | V | 879.494  | Adenylate kinase isoenzyme 6                                            |
| Q9CZM2  | S | T | Y | K | F | E | V |   | 1020.504 | 60S ribosomal protein L15                                               |
| P09632  | V | N | S | L | F | S | K | Y | 957.505  | Homeobox protein Hox-B8 mitochondrial precursor                         |
